# Supplementary material for: Anthraquinones, Diphenyl Ethers, and Their Derivatives from the Culture of the Marine Sponge-Associated Fungus Neosartorya spinosa KUFA 1047
Source: MDPI journal article supplement (doi:10.3390/md19080457), 2021-08-11
Supplement: s1 [file s1]

## Supplementary Materials

### **Anthraquinones, Diphenyl Ethers and Their Derivatives from the Culture of the Marine Sponge-Associated Fungus *Neosartorya spinosa* KUFA 1047**

Joana D. M. de Sá <sup>1</sup>, José A. Pereira <sup>2, 3</sup>, Tida Dethoup <sup>4</sup>, Honorina Cidade <sup>1, 3</sup>, Maria Emília Sousa<sup>1,3</sup>, Inês C. Rodrigues <sup>2</sup>, Paulo M. Costa <sup>2, 3</sup>, Sharad Mistry <sup>5</sup>, Artur M. S. Silva <sup>6</sup>, Anake Kijjoa<sup>2,3\*</sup>

<sup>1</sup> Laboratório de Química Orgânica, Departamento de Ciências Químicas, Faculdade de Farmácia, Universidade do Porto, Rua de Jorge Viterbo Ferreira, 228, 4050-313 Porto, Portugal. E-mail: [joanadmsa2703@gmail.com](mailto:joanadmsa2703@gmail.com) (J.D. M. S.), [hcidade@ff.up.pt](mailto:hcidade@ff.up.pt) (H.C.)

<sup>2</sup> ICBAS-Instituto de Ciências Biomédicas Abel Salazar, Rua de Jorge Viterbo Ferreira, 228, 4050-313 Porto, Portugal. E-mail: [jpereira@icbas.up.pt](mailto:jpereira@icbas.up.pt) (J. A. P.), [inescoutorodrigues@gmail.com](mailto:inescoutorodrigues@gmail.com) (I. R.), [pmcosta@icbas.up.pt](mailto:pmcosta@icbas.up.pt) (P.M.C.)

<sup>3</sup> Interdisciplinary Centre of Marine and Environmental Research (CIIMAR), Terminal de Cruzeiros do Porto de Lexões, Av. General Norton de Matos s/n, 4450-208, Matosinhos, Portugal.

<sup>4</sup> Department of Plant Pathology, Faculty of Agriculture, Kasetsart University, Bangkok 10240, Thailand. E-mail: [tdethoup@yahoo.com](mailto:tdethoup@yahoo.com)

<sup>5</sup> Department of Chemistry, University of Leicester, University Road, Leicester LE 7RH, UK, E-mail: [scm11@leicester.ac.uk](mailto:scm11@leicester.ac.uk)

<sup>6</sup> Departamento de Química & QOPNA, Universidade de Aveiro, 3810-193 Aveiro, Portugal. E-mail: [artur.silva@ua.pt](mailto:artur.silva@ua.pt)

\*Correspondence: [ankijjoa@icbas.up.pt](mailto:ankijjoa@icbas.up.pt); Tel. +351-22-042-8331; Fax: + 351-22-206-2232

**Figure S1.**  $^1\text{H}$  NMR spectrum of **1** (DMSO- $d_6$ , 300MHz).

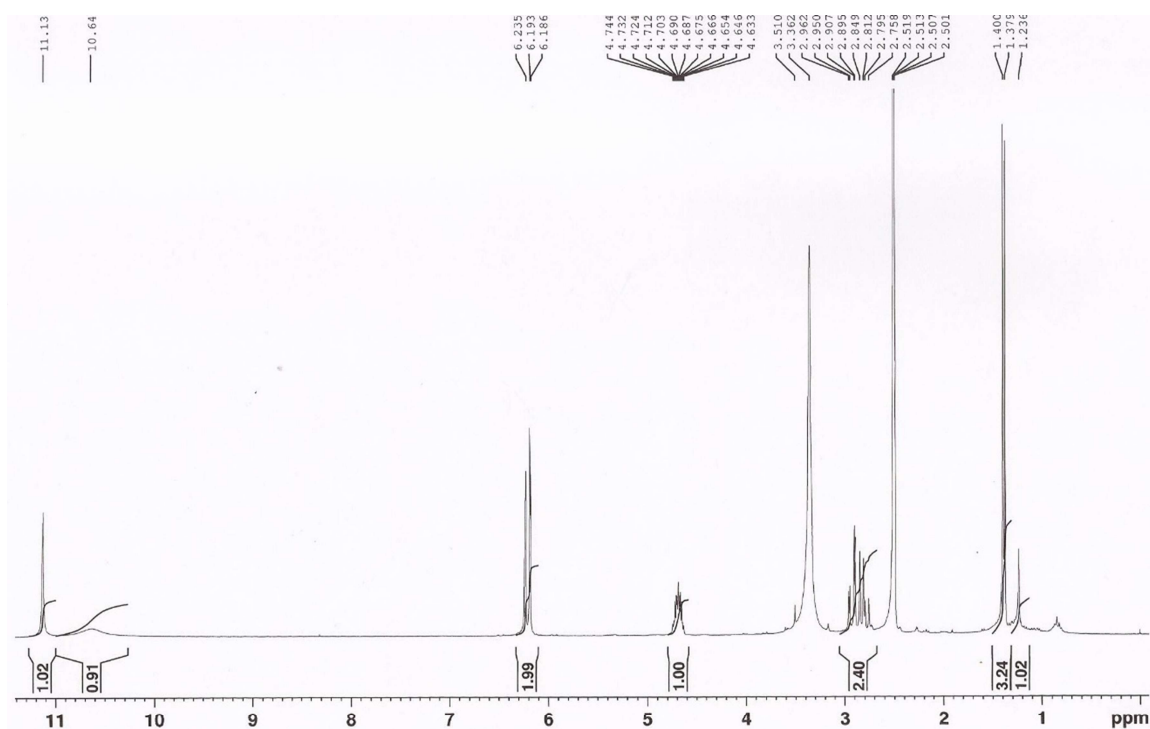

**Figure S2.**  $^{13}\text{C}$  NMR spectrum of **1** (DMSO- $d_6$ , 75 MHz).

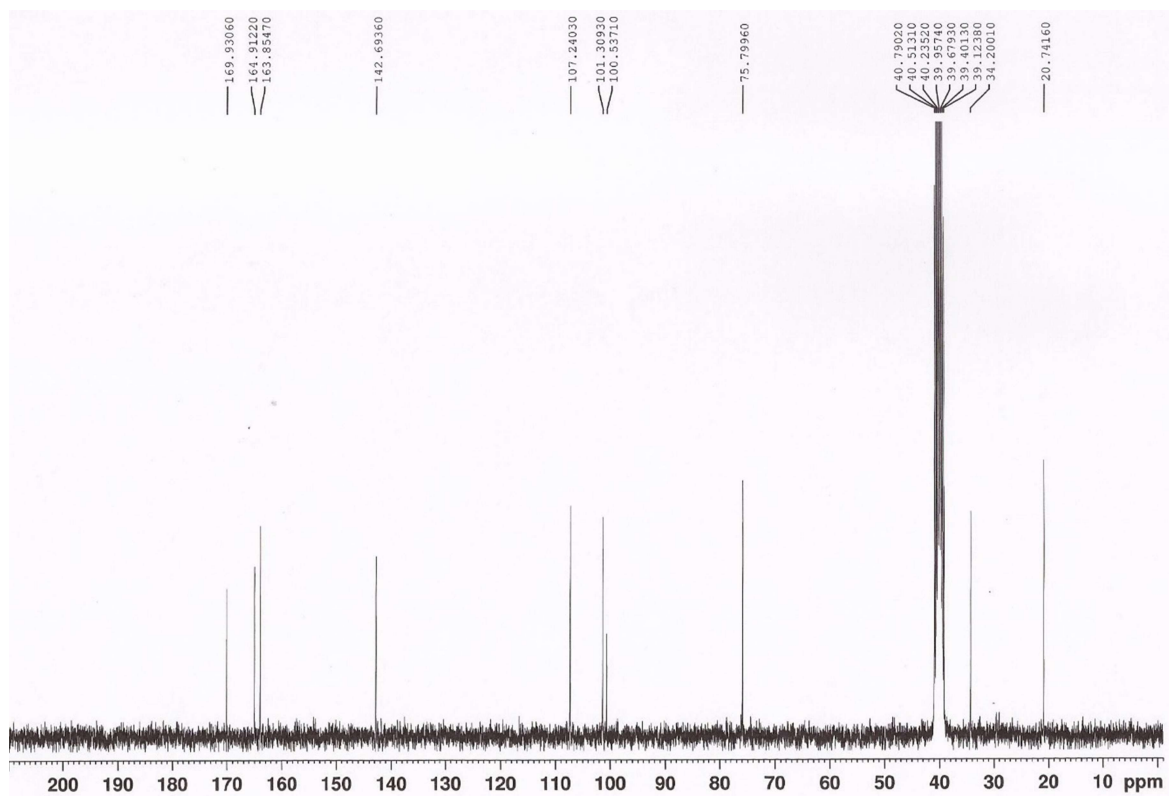

**Figure S3.** COSY spectrum of **1** (DMSO-*d*<sub>6</sub>, 300 MHz).

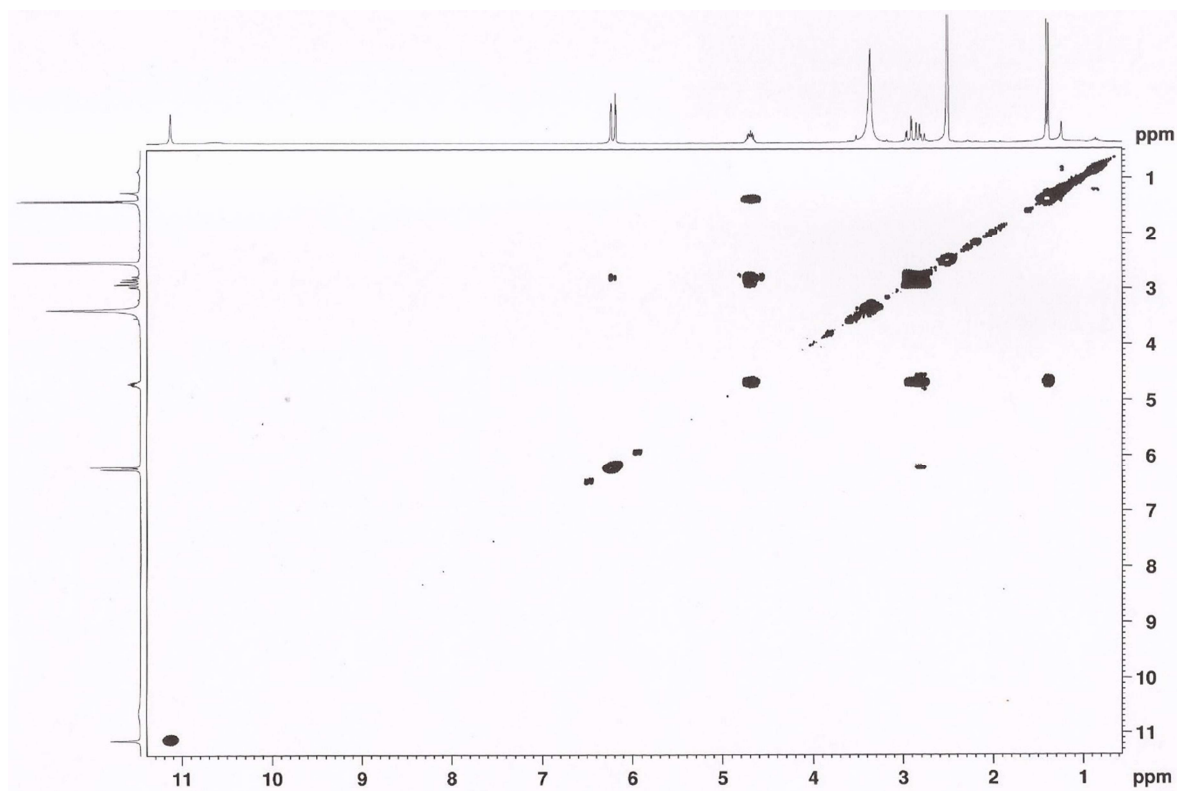

**Figure S4.** HSQC spectrum of **1** (DMSO-*d*<sub>6</sub>, 300 MHz).

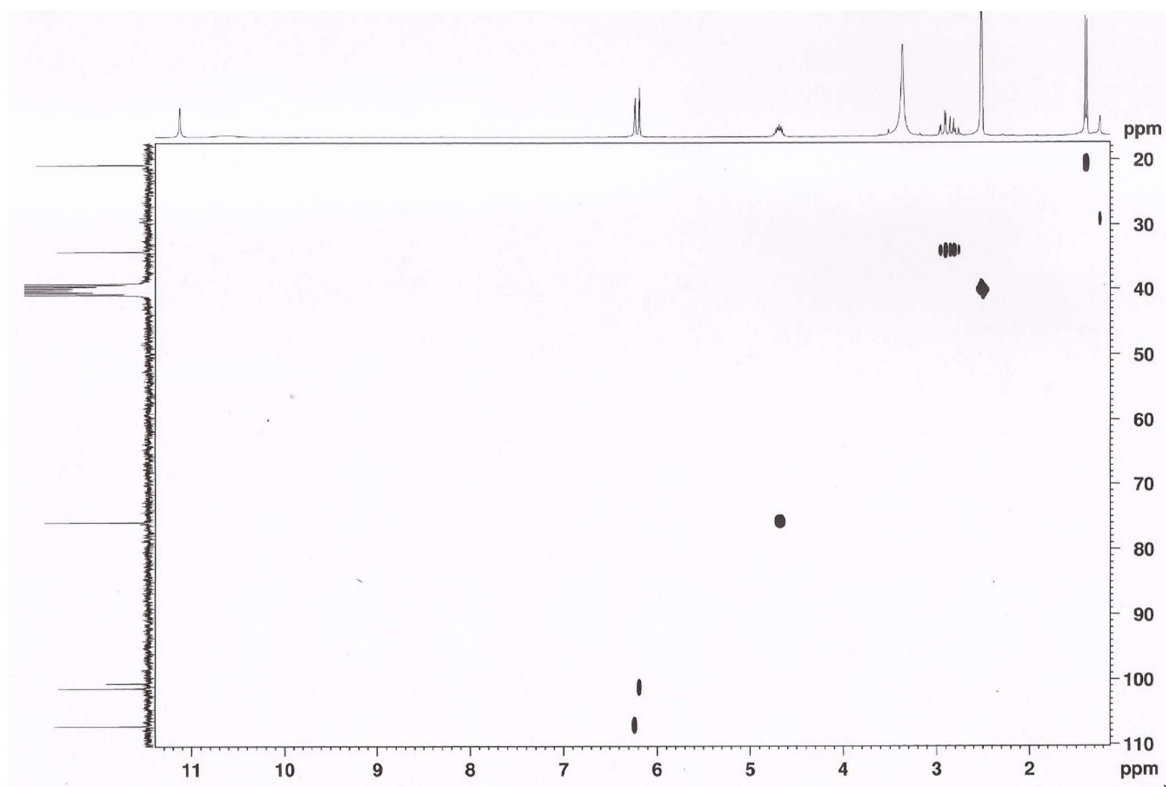

**Figure S5.** HMBC spectrum of **1** (DMSO-*d*<sub>6</sub>, 300 MHz).

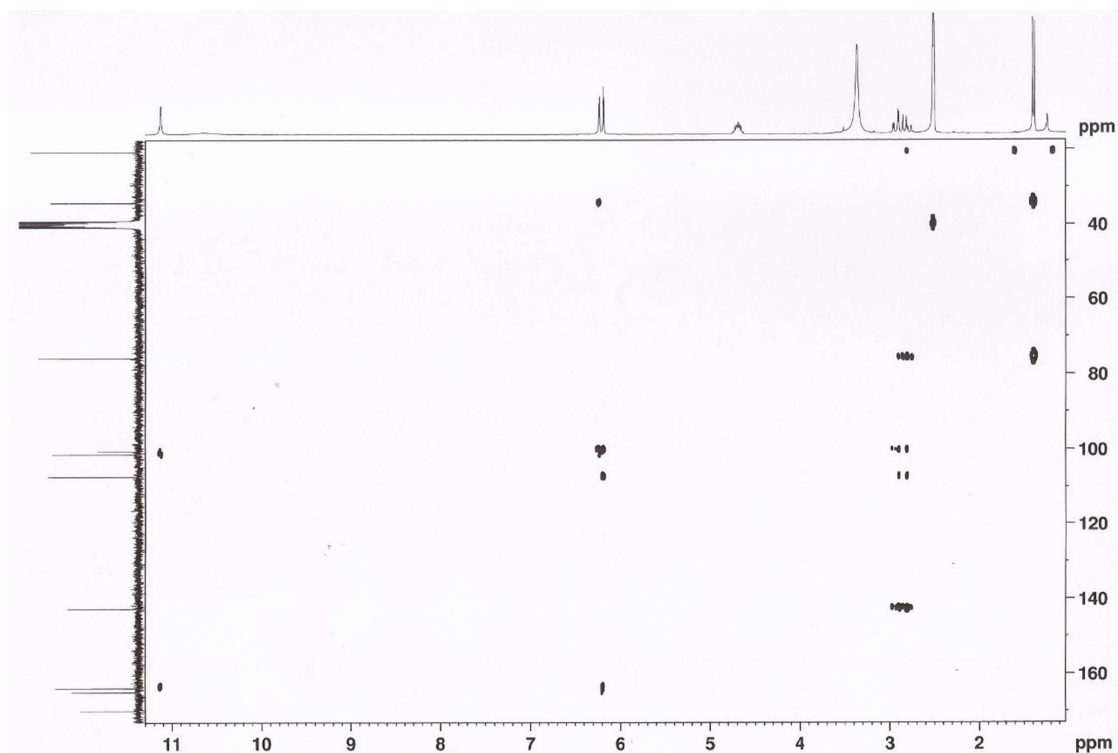

**Figure S6.** (+)-HRESIMS of **1**.

Single Mass Analysis

Tolerance = 5.0 PPM / DBE: min = -1.5, max = 100.0

Element prediction: Off

Number of isotope peaks used for i-FIT = 3

Monoisotopic Mass, Even Electron Ions

12 formula(e) evaluated with 1 results within limits (up to 100 best isotopic matches for each mass)

Elements Used:

C: 10-10 H: 0-150 O: 0-50

Minimum:

-1.5

Maximum:

5.0

5.0

100.0

Mass

Calc. Mass

mDa

PPM

DBE

i-FIT

Norm

Conf(%)

Formula

195.0657

195.0657

0.0

0.0

5.5

515.3

n/a

n/a

C10 H11 O4

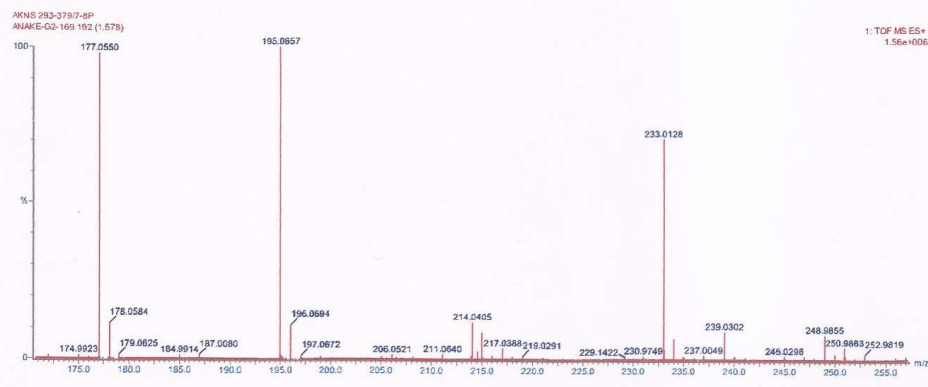



**Figure S7.**  $^1\text{H}$  NMR spectrum of **2** (DMSO- $d_6$ , 300MHz).

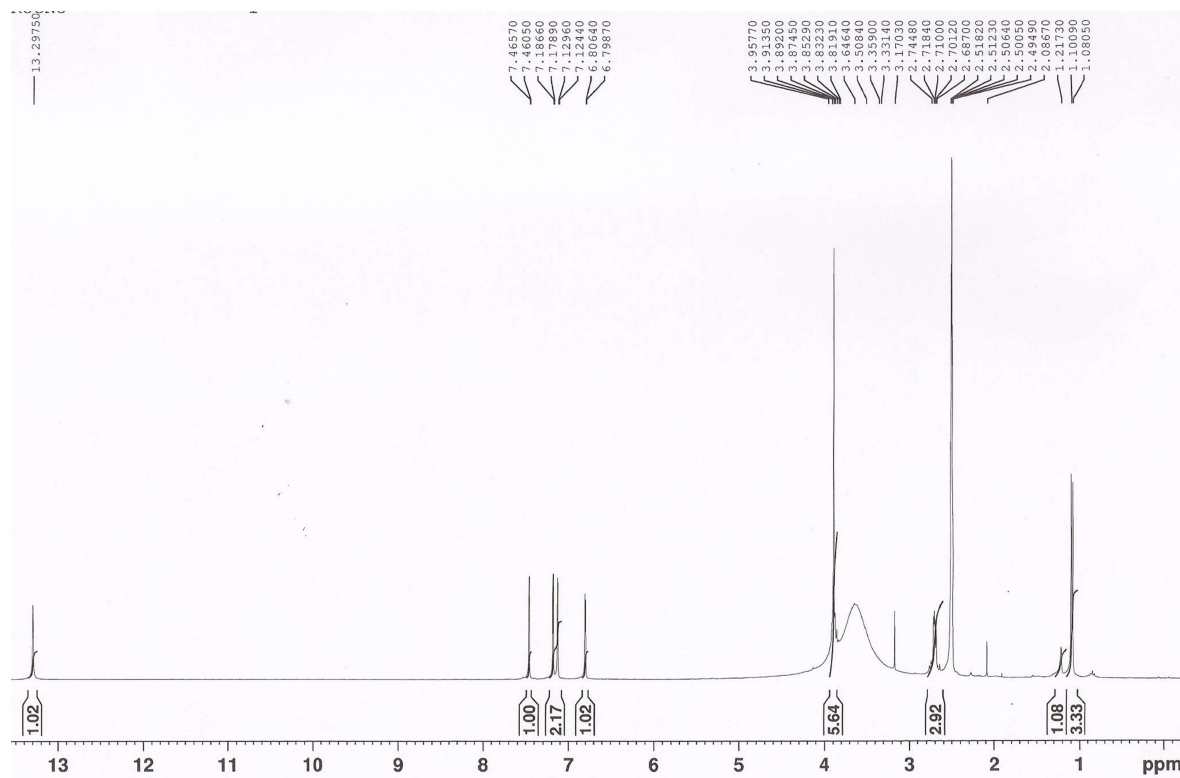

**Figure S8.**  $^{13}\text{C}$  NMR spectrum of **2** (DMSO- $d_6$ , 75MHz).

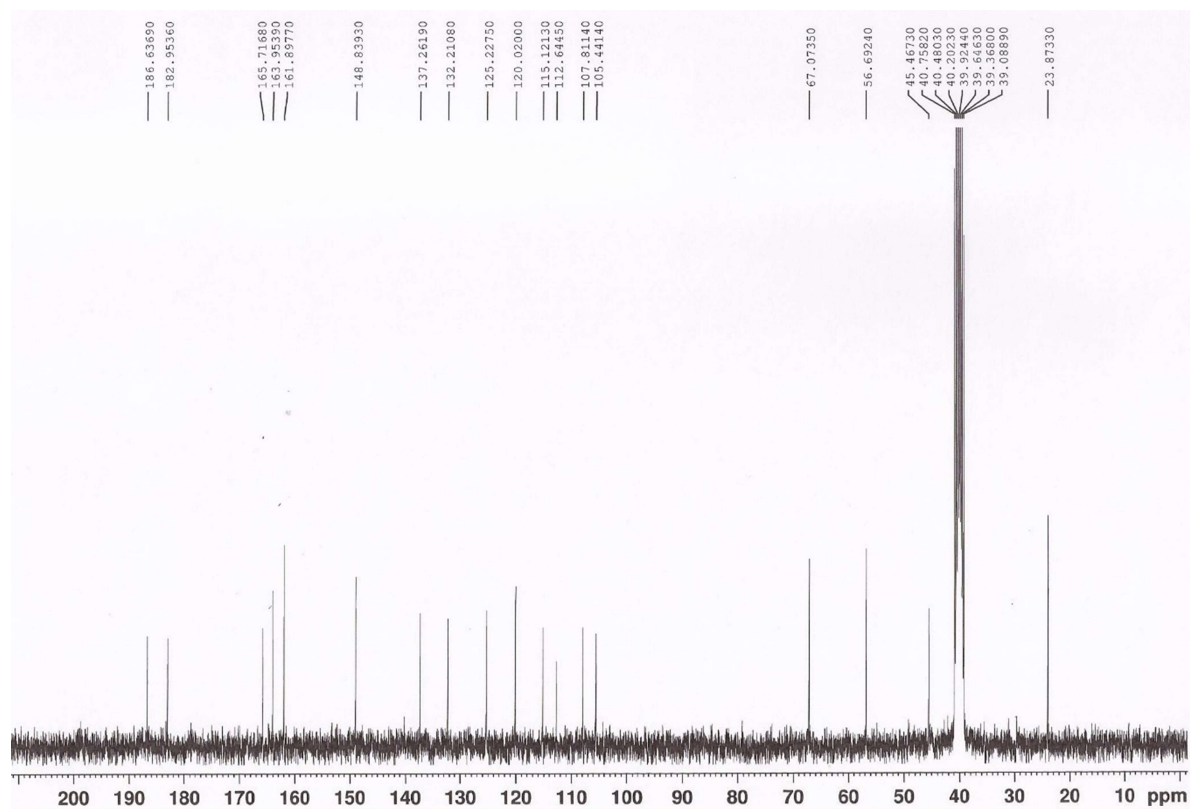

**Figure S9.** COSY spectrum of **2** (DMSO-*d*<sub>6</sub>, 300 MHz).

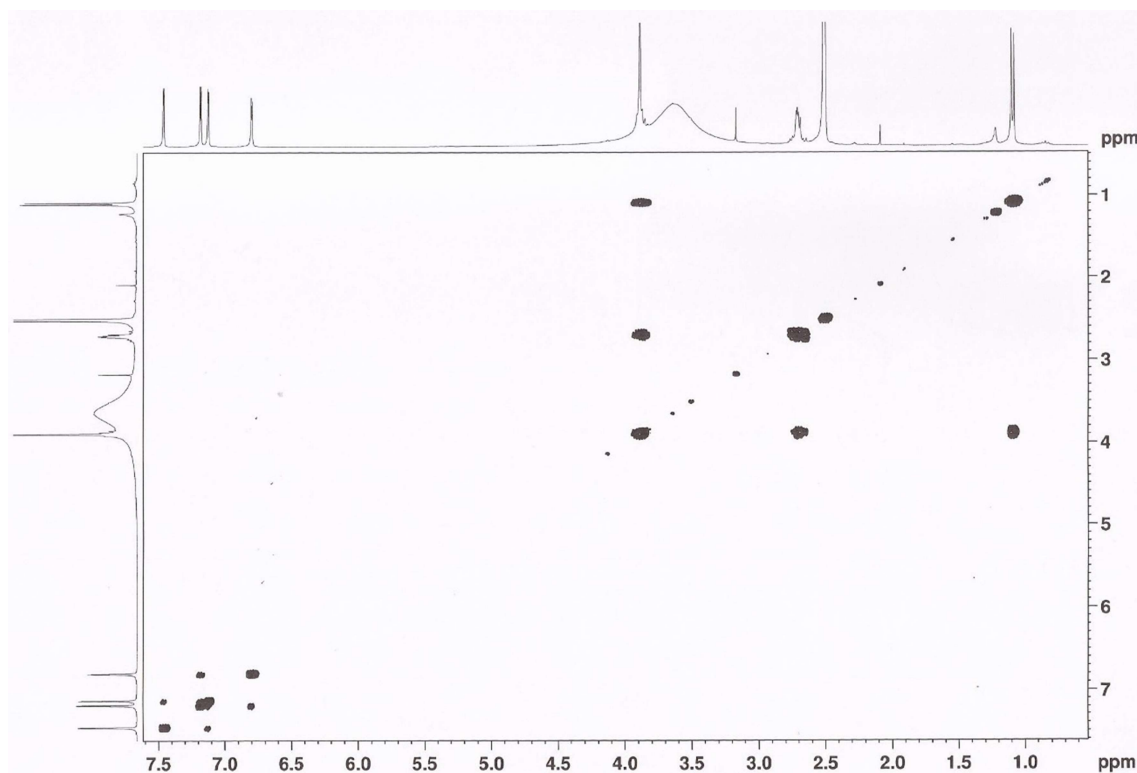

**Figure S10.** HSQC spectrum of **2** (DMSO-*d*<sub>6</sub>, 300 MHz).

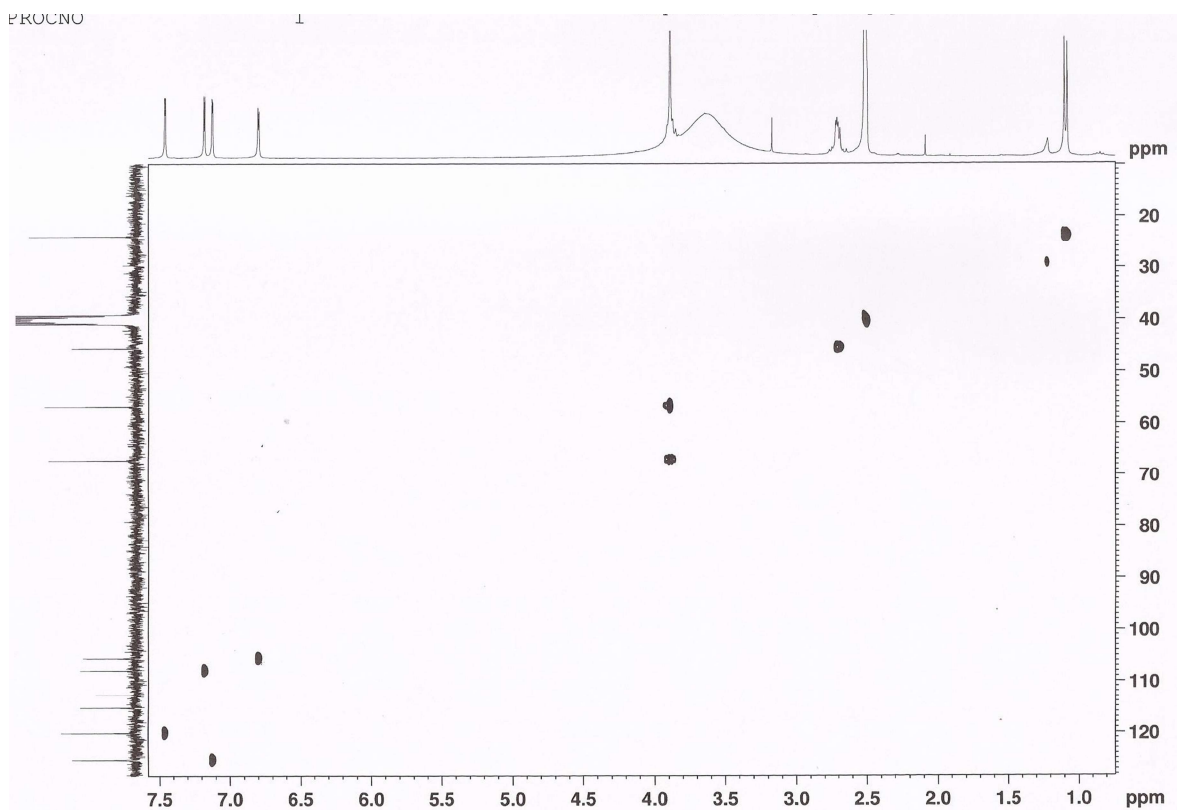

**Figure S11.** HMBC spectrum of **2** (DMSO-*d*<sub>6</sub>, 300 MHz).

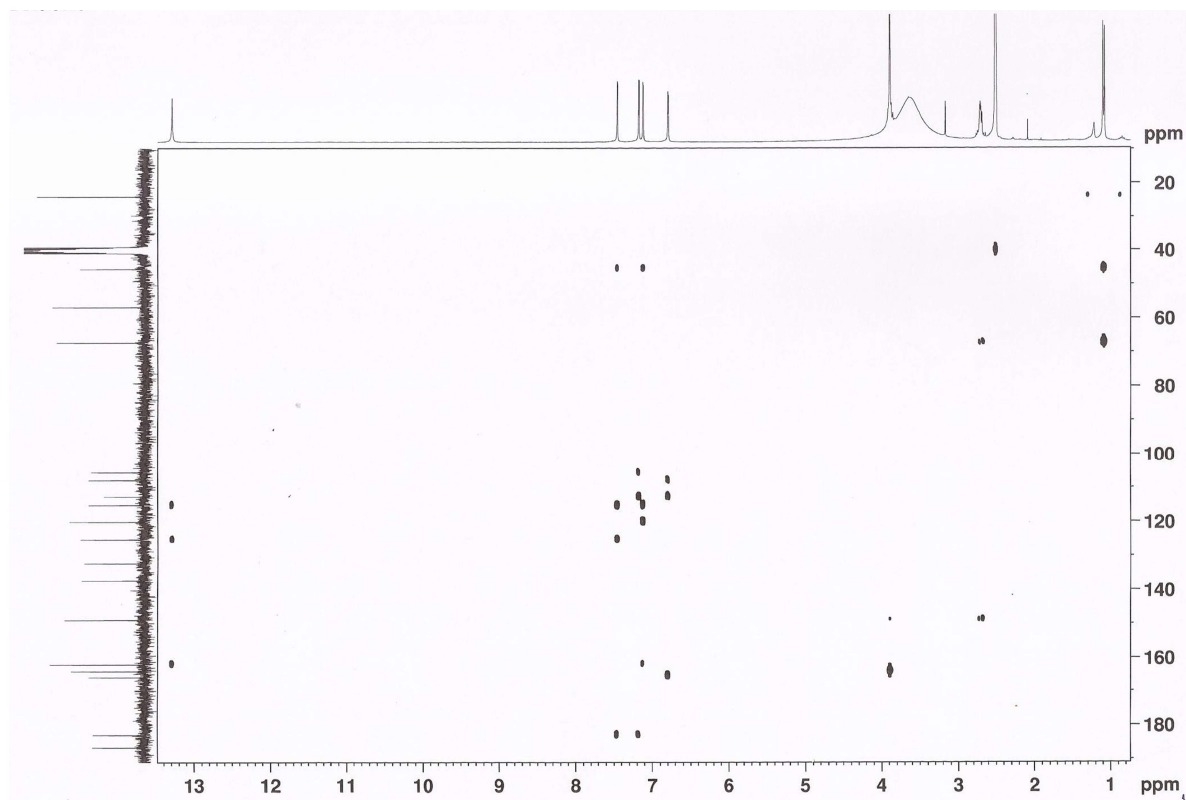

**Figure S12.** (+)-HRESIMS of **2**.

# Elemental Composition Report [MH]<sup>+</sup>

## Single Mass Analysis

Tolerance = 5.0 PPM / DBE: min = -1.5, max = 50.0

Element prediction: Off

Number of isotope peaks used for i-FIT = 3

Monoisotopic Mass, Even Electron Ions

21 formula(e) evaluated with 1 results within limits (up to 100 best isotopic matches for each mass)

Elements Used:

C: 18-18 H: 0-150 O: 0-30

Minimum:

-1.5

Maximum:

5.0 5.0 50.0

| Mass     | Calc. Mass | mDa | PPM | DBE  | i-FIT | Norm | Conf(%) | Formula    |
|----------|------------|-----|-----|------|-------|------|---------|------------|
| 329.1027 | 329.1025   | 0.2 | 0.6 | 10.5 | 704.5 | n/a  | n/a     | C18 H17 O6 |

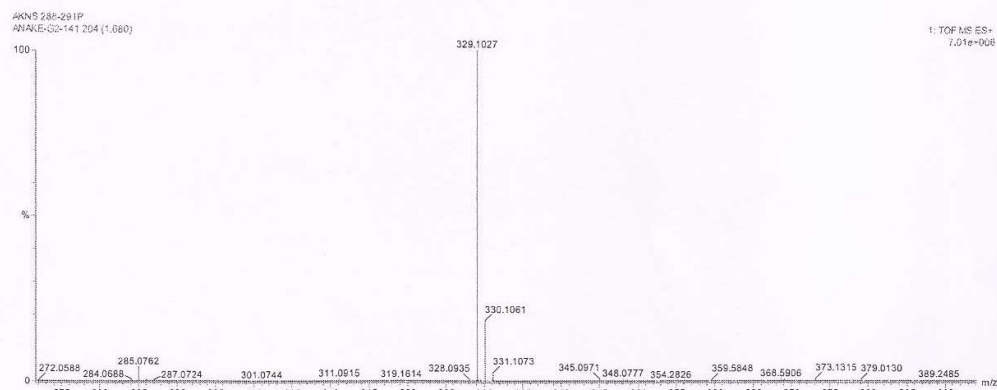

**Figure S13.** <sup>1</sup>H NMR spectrum of a mixture of **3** and **4** (DMSO-*d*<sub>6</sub>, 500 MHz).

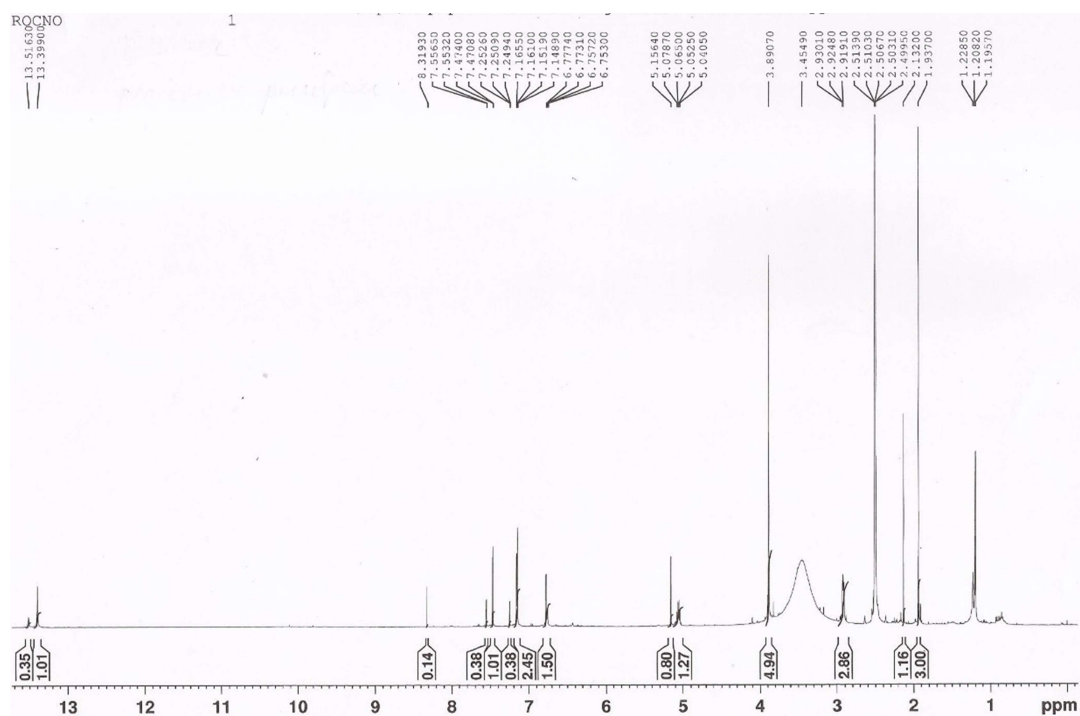

**Figure S14.** <sup>13</sup>C NMR spectrum of a mixture of **3** and **4** (DMSO-*d*<sub>6</sub>, 125 MHz).

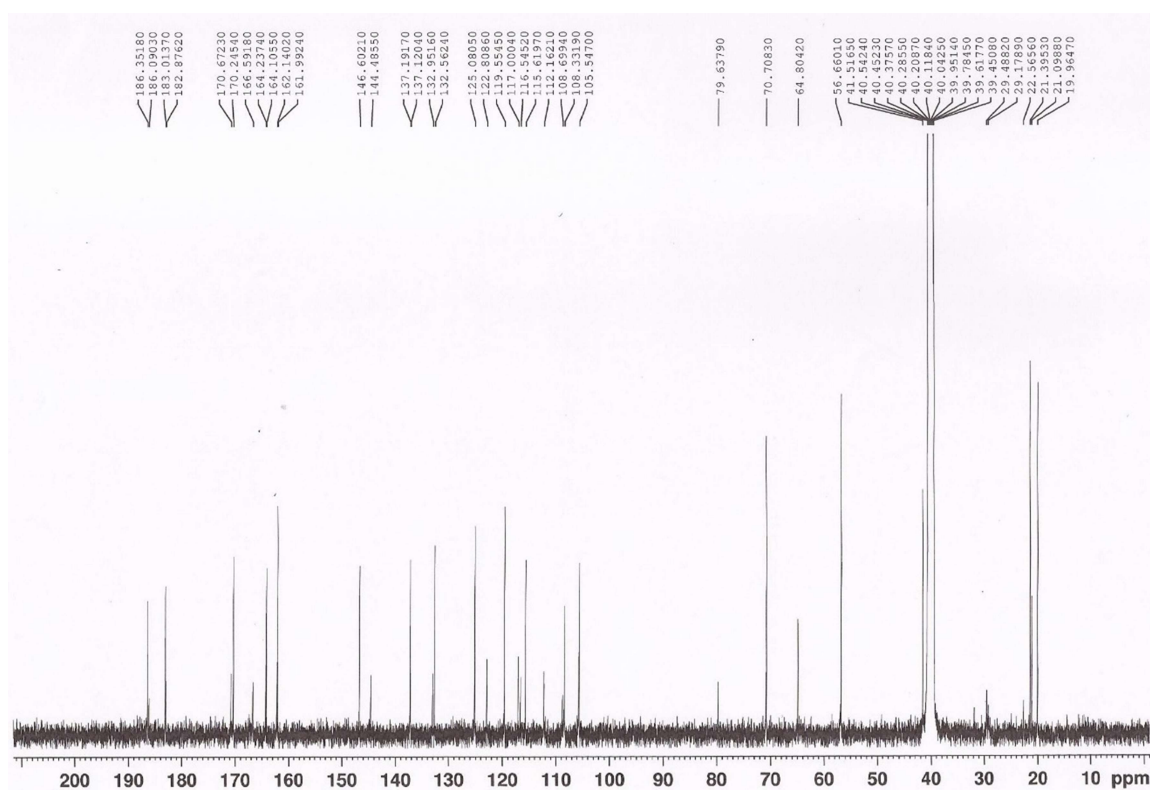

**Figure S15.** COSY spectrum of a mixture of **3** and **4** (DMSO- $d_6$ , 500 MHz).

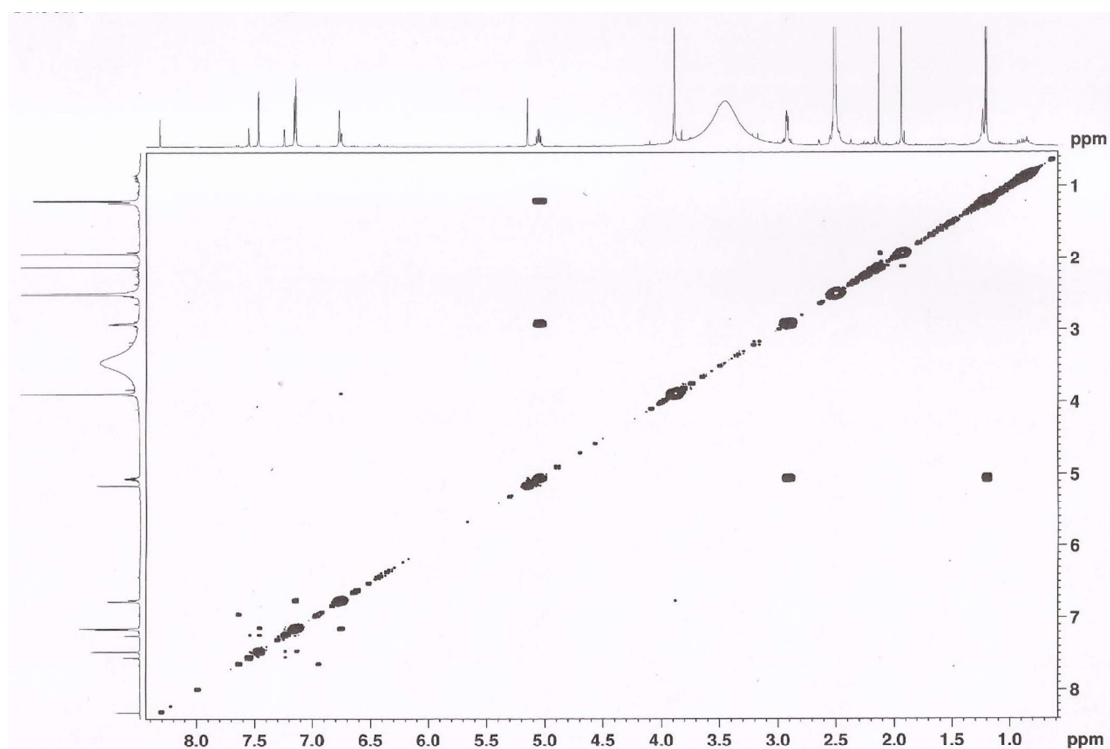

**Figure S16.** HSQC of a mixture of **3** and **4** (DMSO-*d*<sub>6</sub>, 500 MHz).

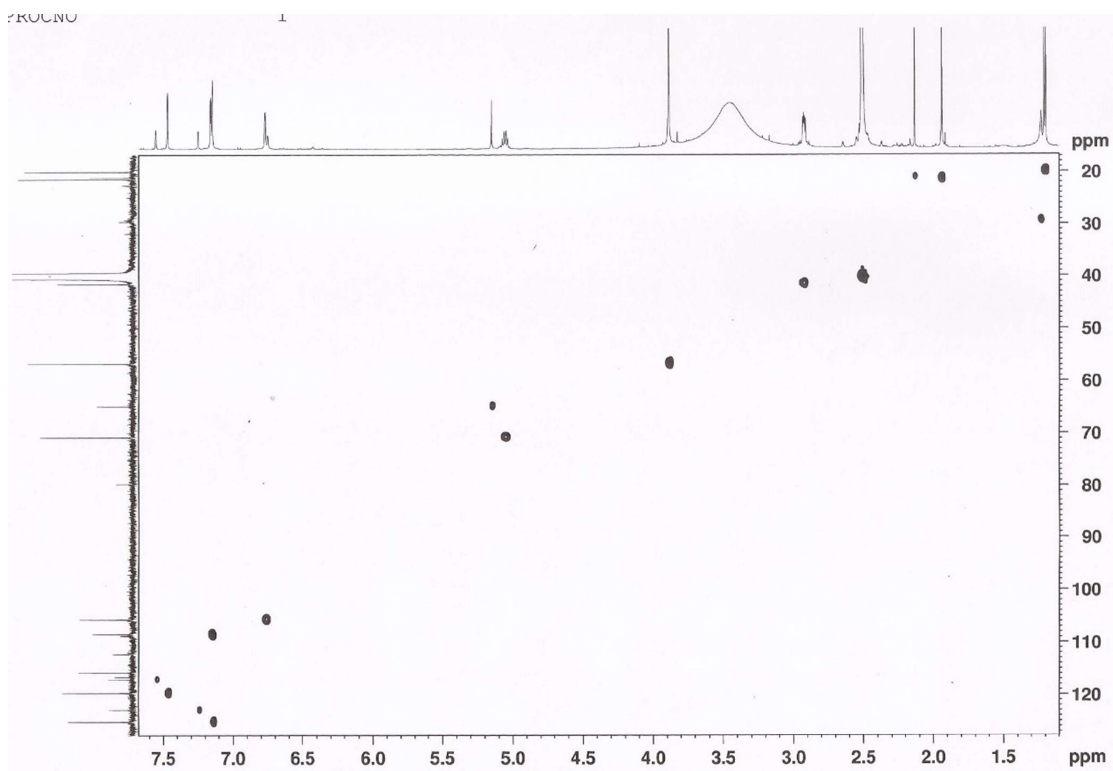

**Figure S17.** HMBC of a mixture of **3** and **4** (DMSO-*d*<sub>6</sub>, 500 MHz).

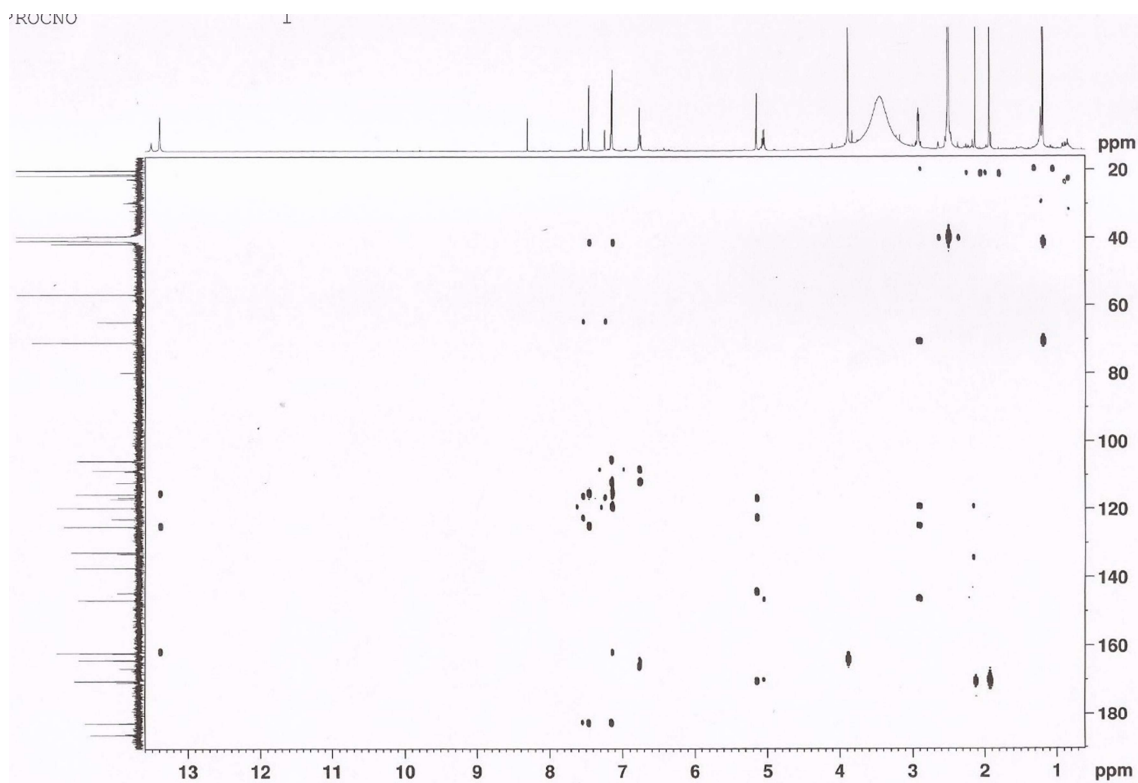

**Figure S18.** (+)-HRESIMS of **3**.



### Elemental Composition Report [MH]<sup>+</sup>

Single Mass Analysis

Tolerance = 5.0 PPM / DBE: min = -1.5, max = 50.0

Element prediction: Off

Number of isotope peaks used for i-FIT = 3

Monoisotopic Mass, Even Electron Ions

22 formula(e) evaluated with 1 results within limits (up to 100 best isotopic matches for each mass)

Elements Used:

C: 18-18 H: 0-150 O: 0-30

Minimum: -1.5

Maximum: 5.0 5.0 50.0

| Mass     | Calc. Mass | mDa  | PPM  | DBE  | i-FIT | Norm | Conf(%) | Formula                                        |
|----------|------------|------|------|------|-------|------|---------|------------------------------------------------|
| 343.0809 | 343.0818   | -0.9 | -2.6 | 11.5 | 908.8 | n/a  | n/a     | C <sub>18</sub> H <sub>15</sub> O <sub>7</sub> |

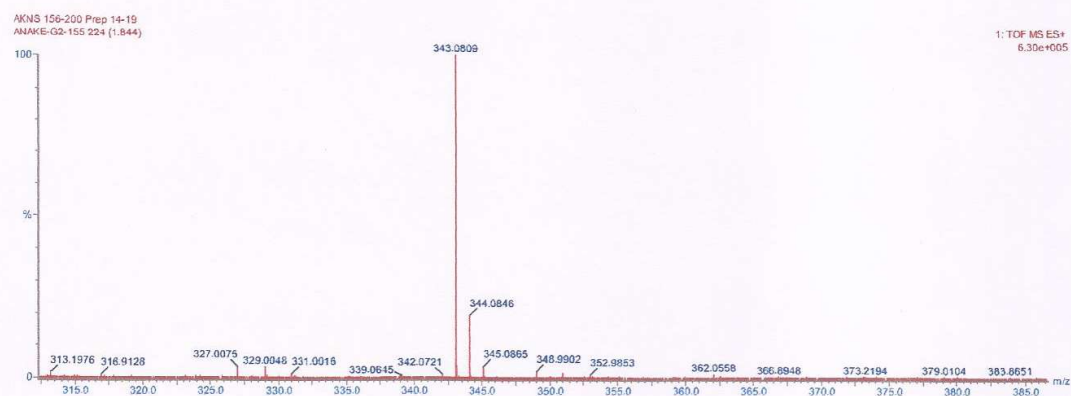

**Figure S19.** (+)-HRESIMS of **4**.



### Elemental Composition Report [MH]<sup>+</sup>

Single Mass Analysis

Tolerance = 5.0 PPM / DBE: min = -1.5, max = 50.0

Element prediction: Off

Number of isotope peaks used for i-FIT = 3

Monoisotopic Mass, Even Electron Ions

24 formula(e) evaluated with 1 results within limits (up to 100 best isotopic matches for each mass)

Elements Used:

C: 20-20 H: 0-150 O: 0-30

Minimum:

-1.5

Maximum:

5.0

5.0

50.0

| Mass     | Calc. Mass | mDa  | PPM  | DBE  | i-FIT | Norm | Conf(%) | Formula                                        |
|----------|------------|------|------|------|-------|------|---------|------------------------------------------------|
| 371.1124 | 371.1131   | -0.7 | -1.9 | 11.5 | 480.6 | n/a  | n/a     | C <sub>20</sub> H <sub>19</sub> O <sub>7</sub> |

### Elemental Composition Report [MNa]<sup>+</sup>

Single Mass Analysis

Tolerance = 5.0 PPM / DBE: min = -1.5, max = 50.0

Element prediction: Off

Number of isotope peaks used for i-FIT = 3

Monoisotopic Mass, Even Electron Ions

49 formula(e) evaluated with 1 results within limits (up to 100 best isotopic matches for each mass)

Elements Used:

C: 20-20 H: 0-150 O: 0-30 Na: 0-1

Minimum:

-1.5

Maximum:

5.0

5.0

50.0

| Mass     | Calc. Mass | mDa  | PPM  | DBE  | i-FIT | Norm | Conf(%) | Formula                                           |
|----------|------------|------|------|------|-------|------|---------|---------------------------------------------------|
| 393.0945 | 393.0950   | -0.5 | -1.3 | 11.5 | 747.8 | n/a  | n/a     | C <sub>20</sub> H <sub>18</sub> O <sub>7</sub> Na |

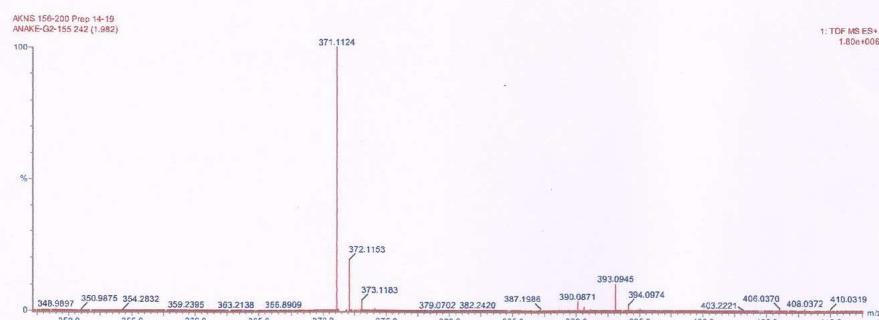

Figure S20. <sup>1</sup>H NMR spectrum of **5** (DMSO-*d*<sub>6</sub>, 300 MHz).

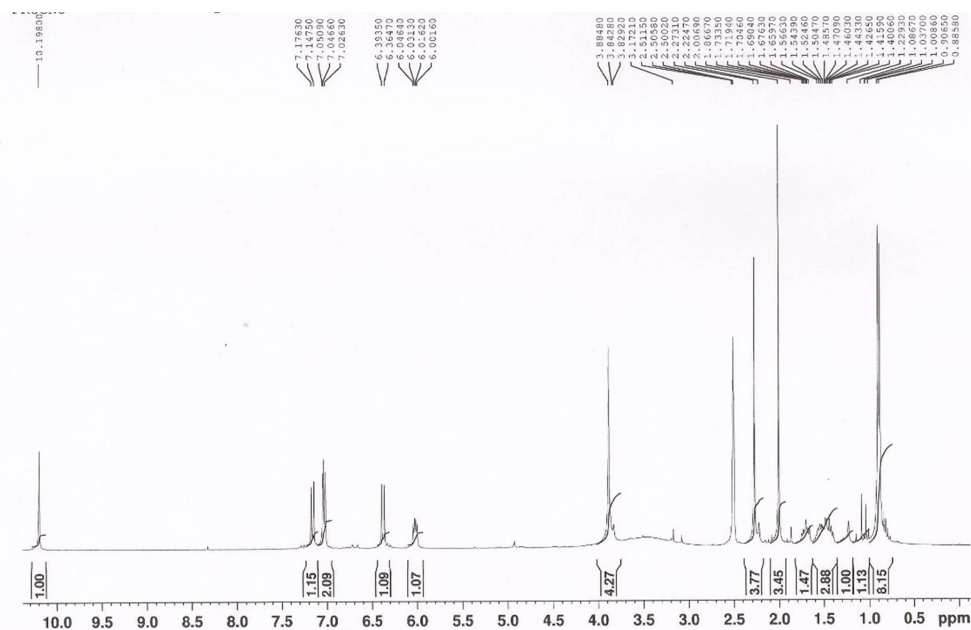

Figure S21. <sup>13</sup>C NMR spectrum of **5** (DMSO-*d*<sub>6</sub>, 575 MHz).

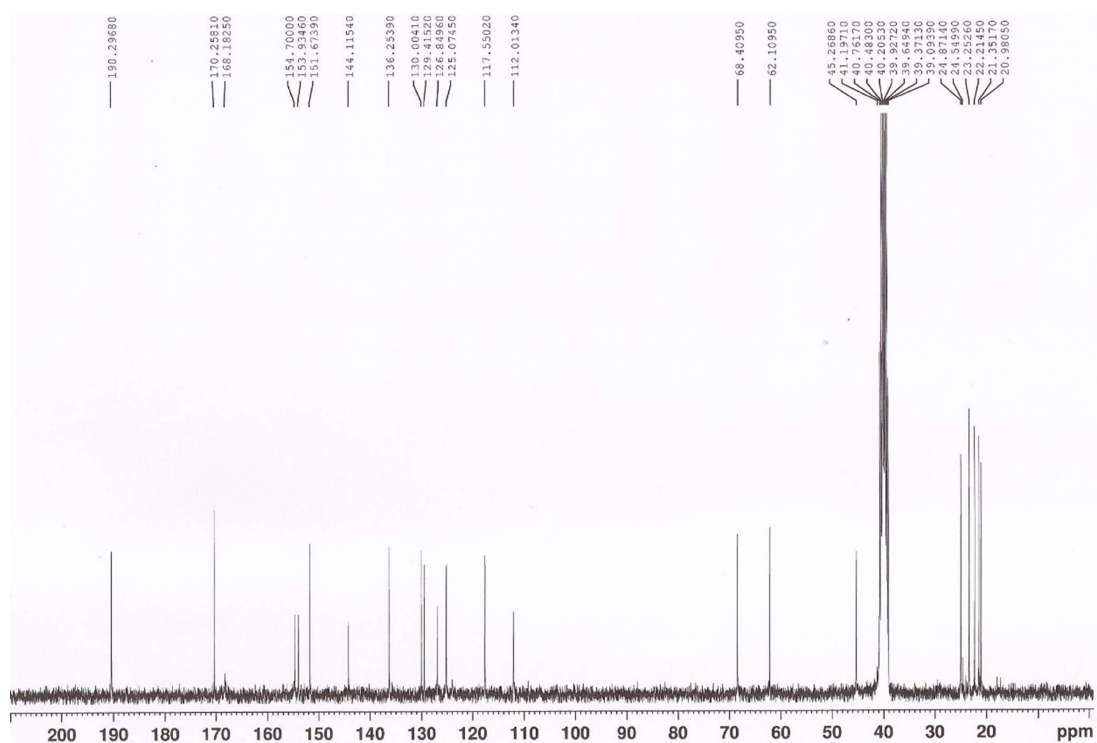

**Figure S22.** COSY spectrum of **5** (DMSO- $d_6$ , 300 MHz).

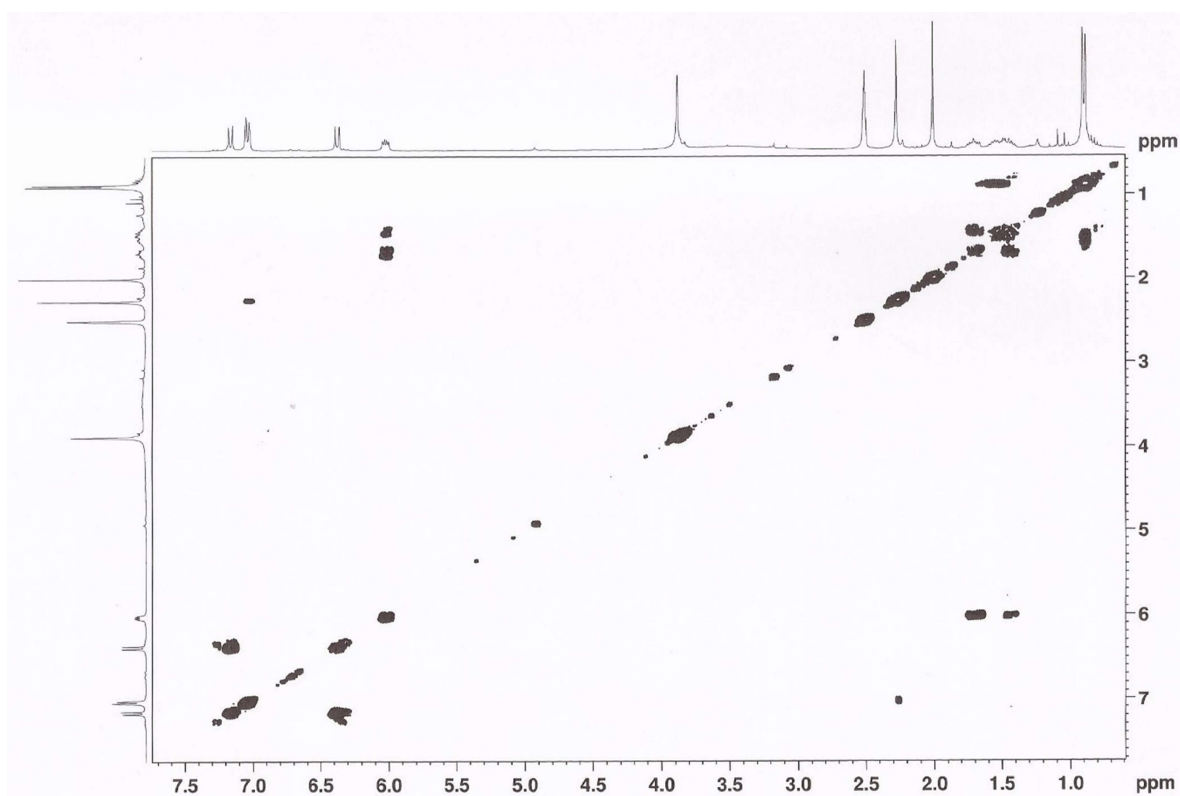

**Figure S23.** HSQC spectrum of **5** (DMSO- $d_6$ , 300 MHz).

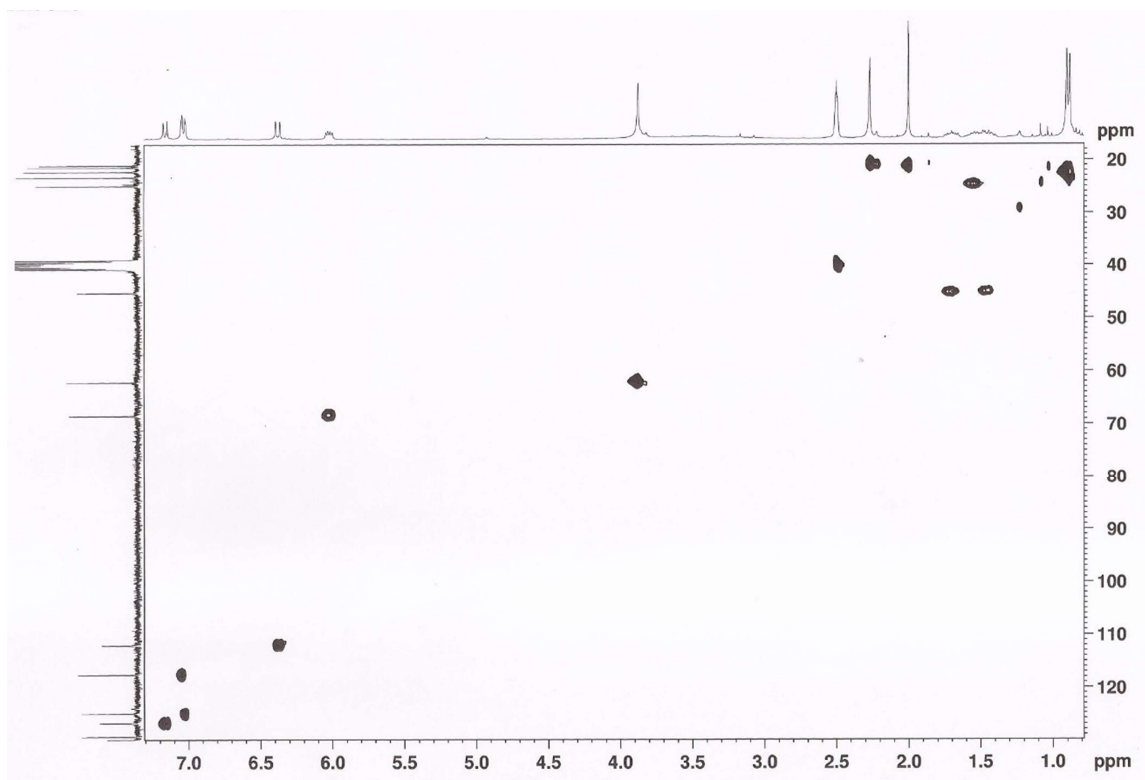

**Figure S24.** HMBC spectrum of **5** (DMSO-*d*<sub>6</sub>, 300 MHz).

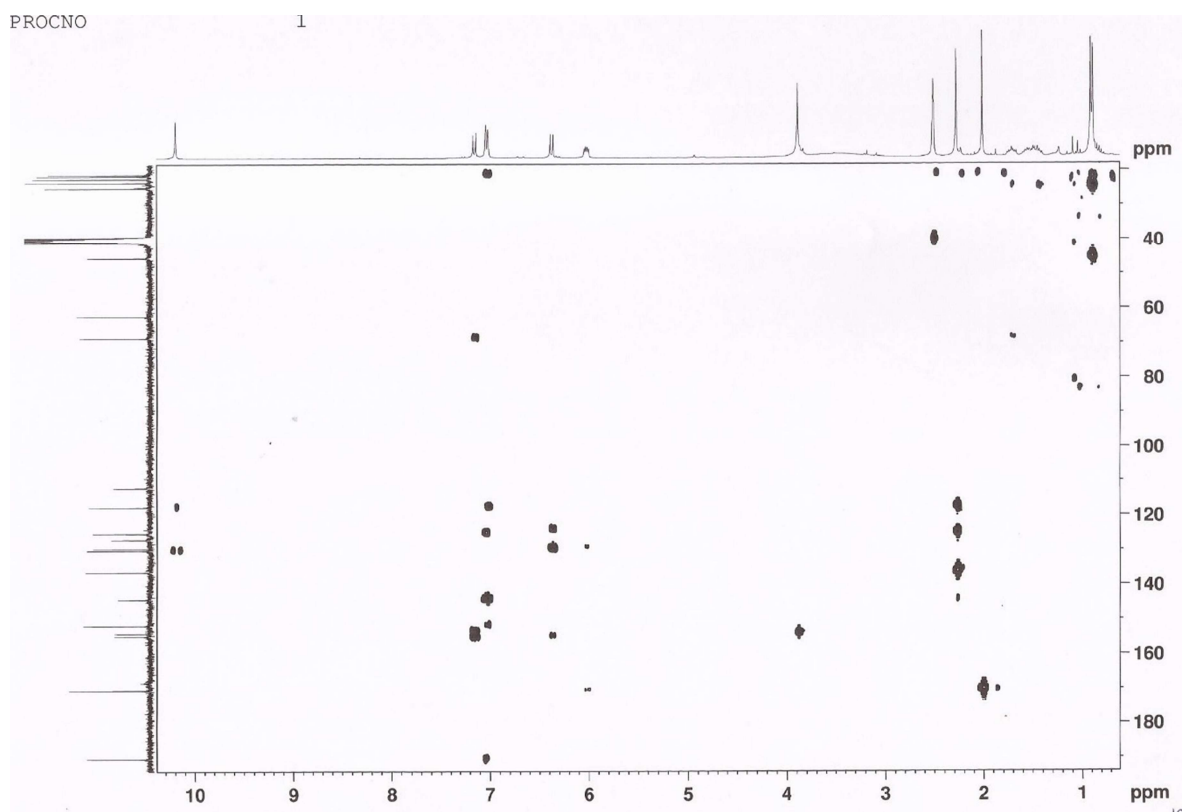

**Figure S25.** . (+)-HRESIMS of **5**.



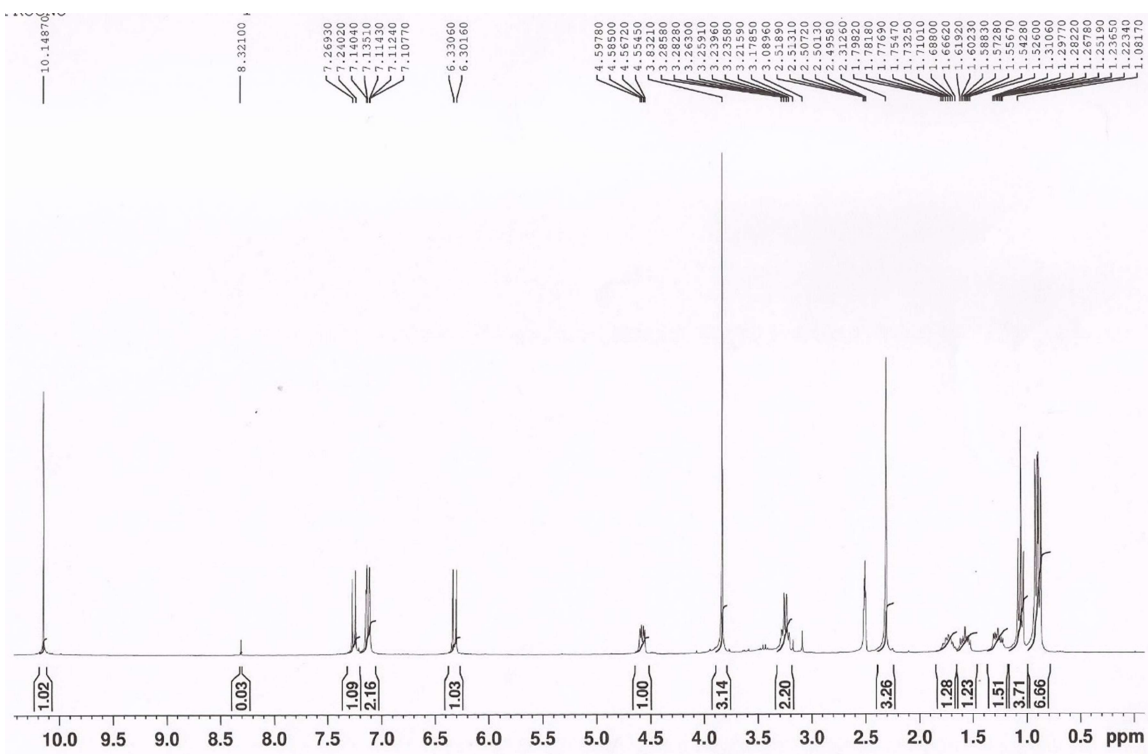

**Figure S27.** <sup>13</sup>C NMR spectrum of **6** (DMSO-*d*<sub>6</sub>, 300 MHz).

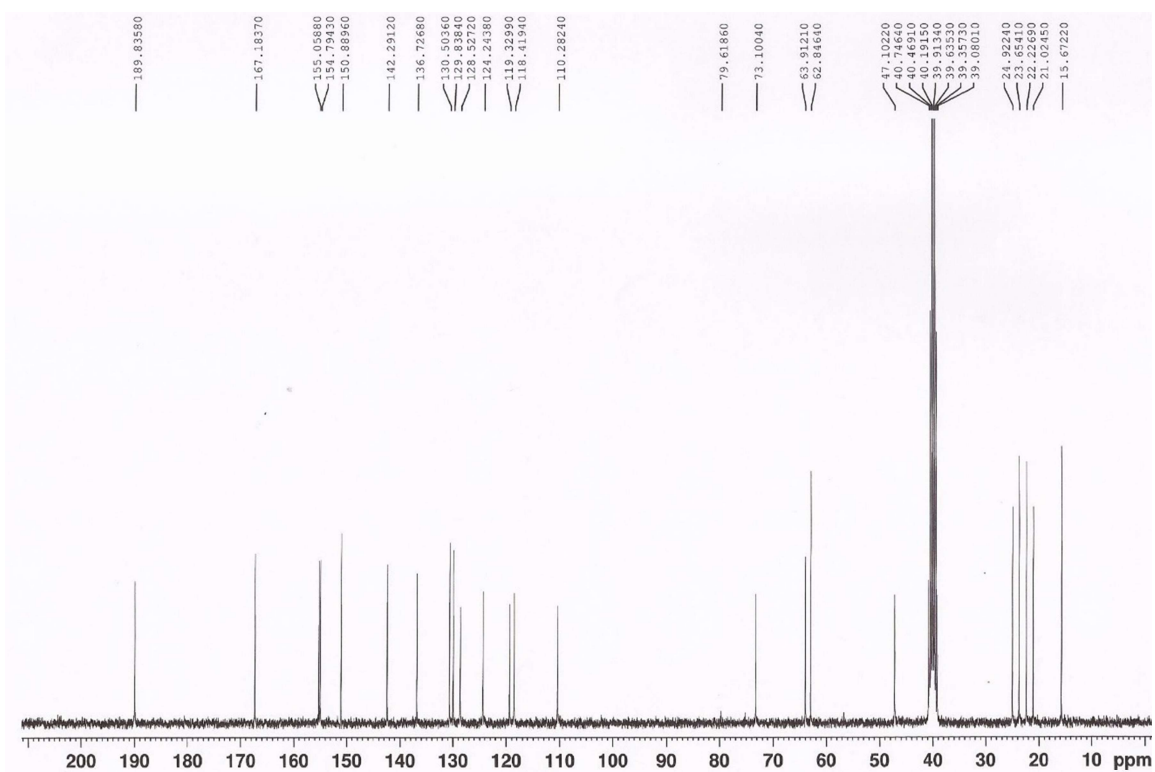

**Figure S28.** COSY spectrum of **6** (DMSO-*d*<sub>6</sub>, 300 MHz).

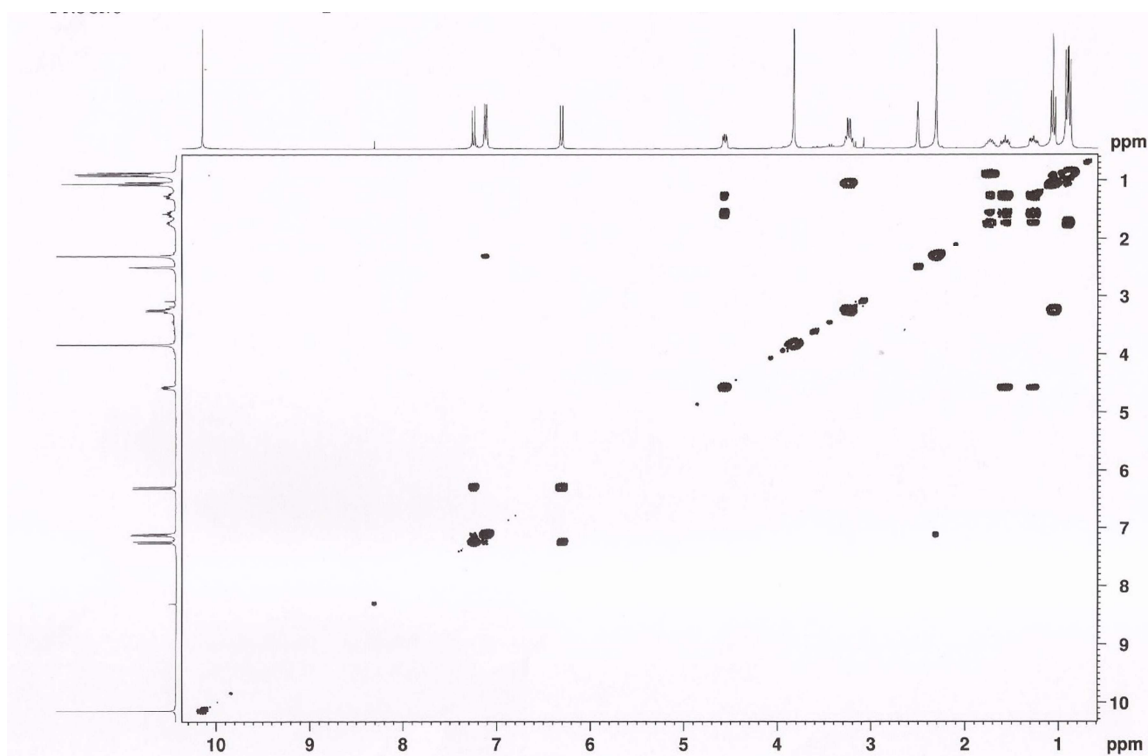

**Figure S29.** HSQC spectrum of **6** (DMSO-*d*<sub>6</sub>, 300 MHz).

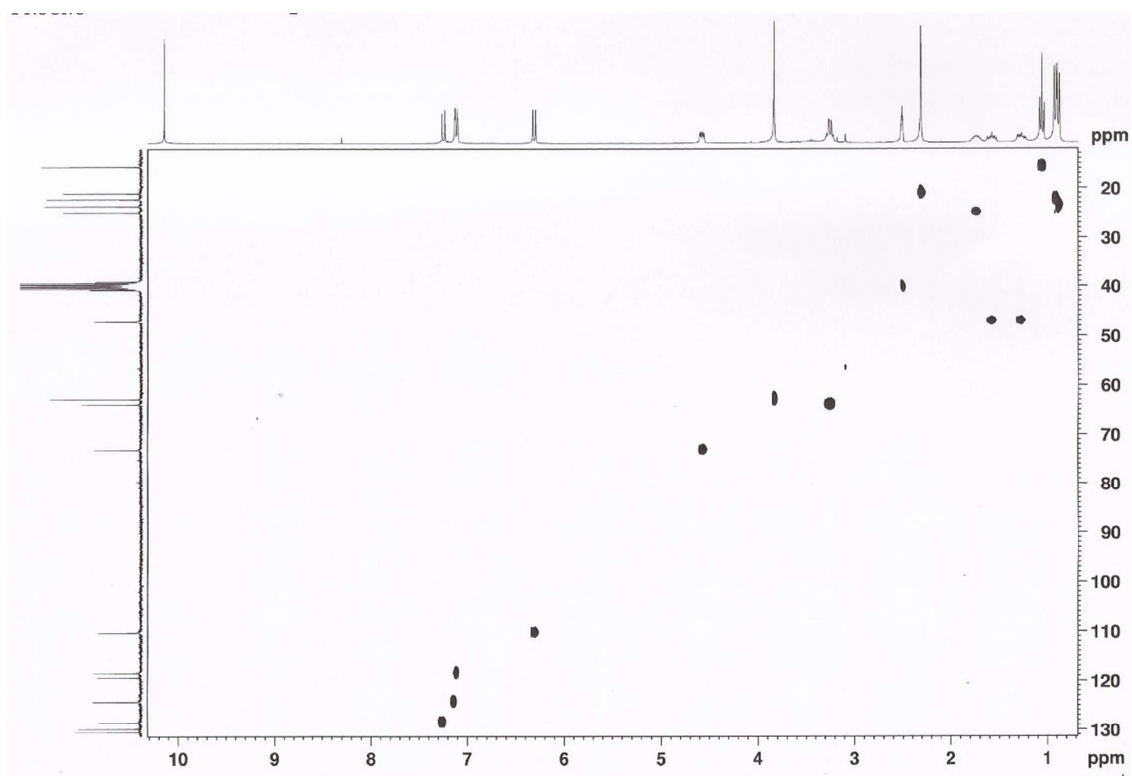

**Figure S30.** HMBC spectrum of **6** (DMSO-*d*<sub>6</sub>, 300 MHz).



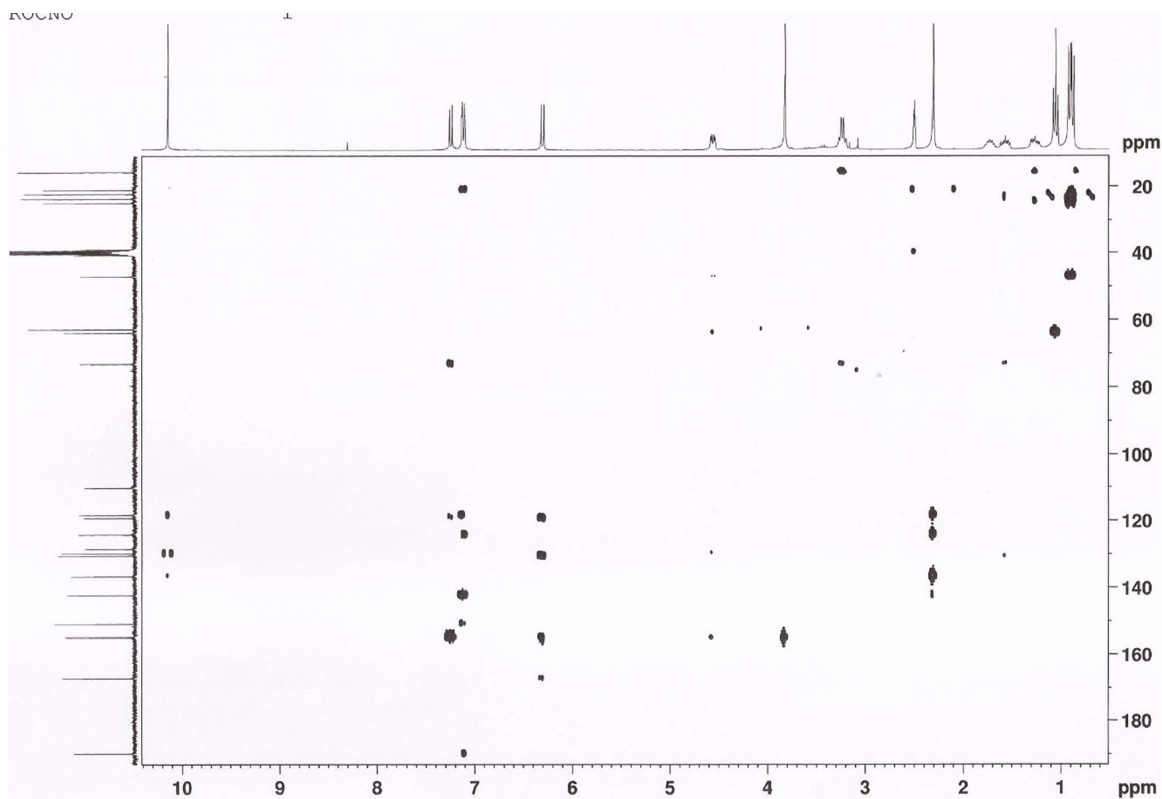

**Figure S31.** (+)-HRESIMS of **6**.

#### Elemental Composition Report [MH]<sup>+</sup>

Single Mass Analysis

Tolerance = 5.0 PPM / DBE: min = -1.5, max = 50.0

Element prediction: Off

Number of isotope peaks used for i-FIT = 3

Monoisotopic Mass, Even Electron Ions

26 formula(e) evaluated with 1 results within limits (up to 100 best isotopic matches for each mass)

Elements Used:

C: 23-23 H: 0-150 O: 0-30

Minimum:

-1.5

Maximum:

5.0

5.0

50.0

Mass

Calc. Mass

mDa

PPM

DBE

i-FIT

Norm

Conf(%)

Formula

417.1915

417.1913

0.2

0.5

9.5

377.3

n/a

n/a

C<sub>23</sub>H<sub>29</sub>O<sub>7</sub>

#### Elemental Composition Report [MNa]<sup>+</sup>

Single Mass Analysis

Tolerance = 5.0 PPM / DBE: min = -1.5, max = 50.0

Element prediction: Off

Number of isotope peaks used for i-FIT = 3

Monoisotopic Mass, Even Electron Ions

54 formula(e) evaluated with 1 results within limits (up to 100 best isotopic matches for each mass)

Elements Used:

C: 23-23 H: 0-150 O: 0-30 Na: 0-1

Minimum:

-1.5

Maximum:

5.0

5.0

50.0

Mass

Calc. Mass

mDa

PPM

DBE

i-FIT

Norm

Conf(%)

Formula

439.1735

439.1733

0.2

0.5

9.5

541.9

n/a

n/a

C<sub>23</sub>H<sub>28</sub>O<sub>7</sub>Na

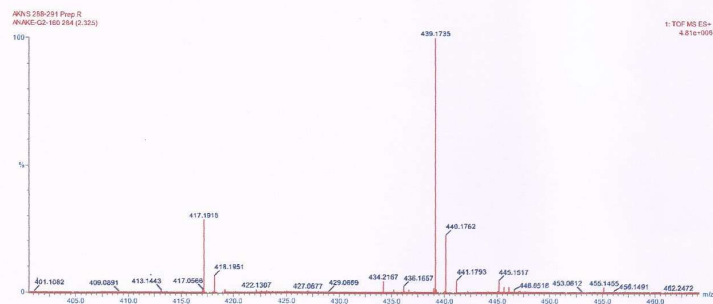

**Figure S32.** <sup>1</sup>H NMR spectrum of **7** (DMSO-*d*<sub>6</sub>, 500 MHz).



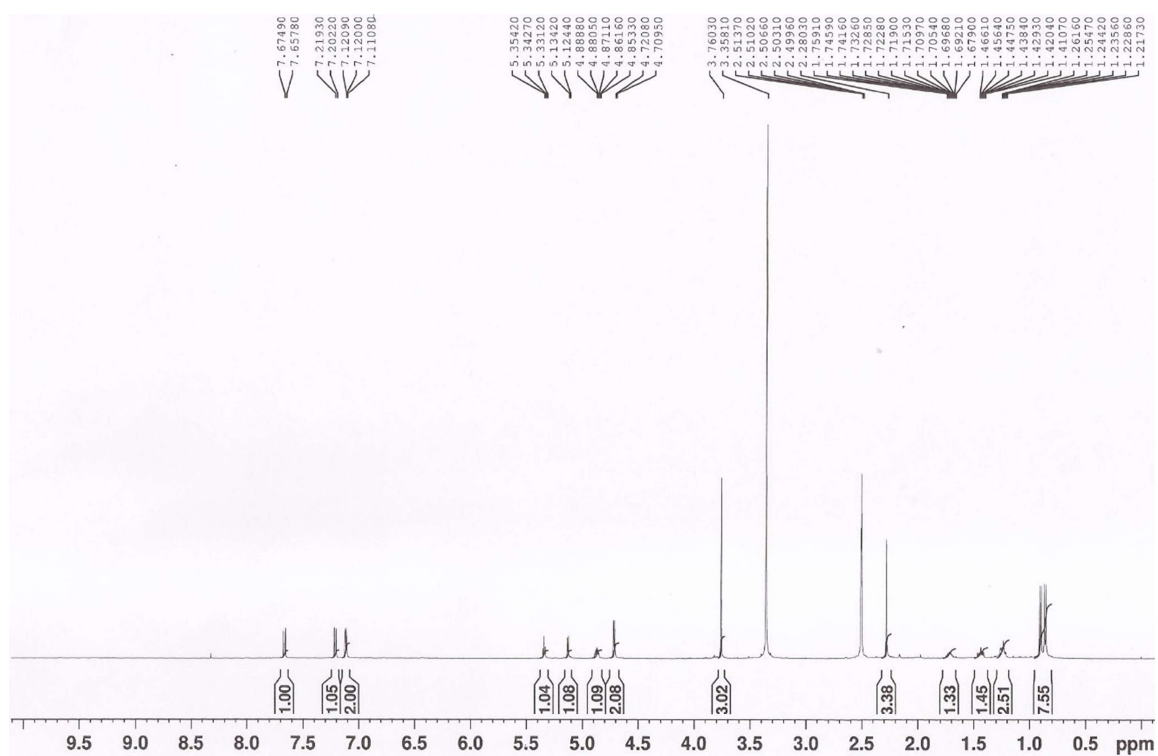

**Figure S33.** <sup>13</sup>C NMR spectrum of **7** (DMSO-*d*<sub>6</sub>, 125 MHz).

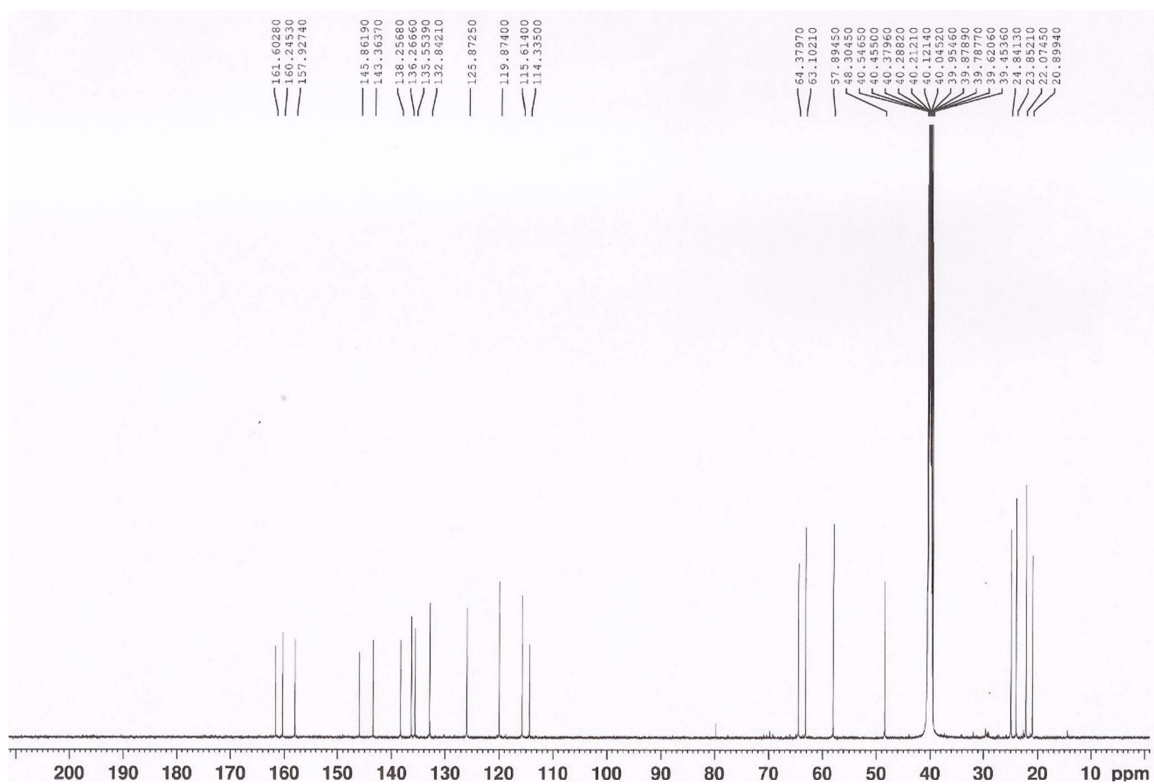

**Figure S34.** COSY spectrum of **7** (DMSO-*d*<sub>6</sub>, 500 MHz).

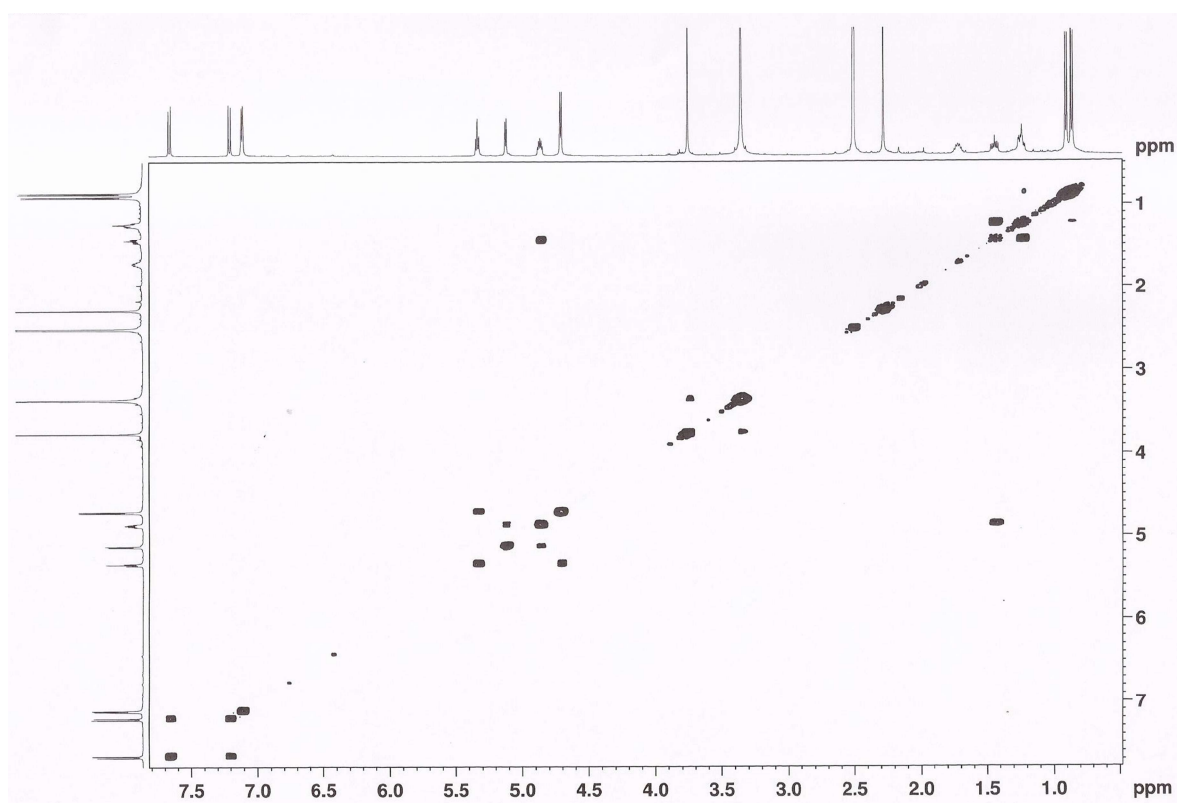

**Figure S35.** HSQC spectrum of **7** (DMSO- $d_6$ , 500 MHz).

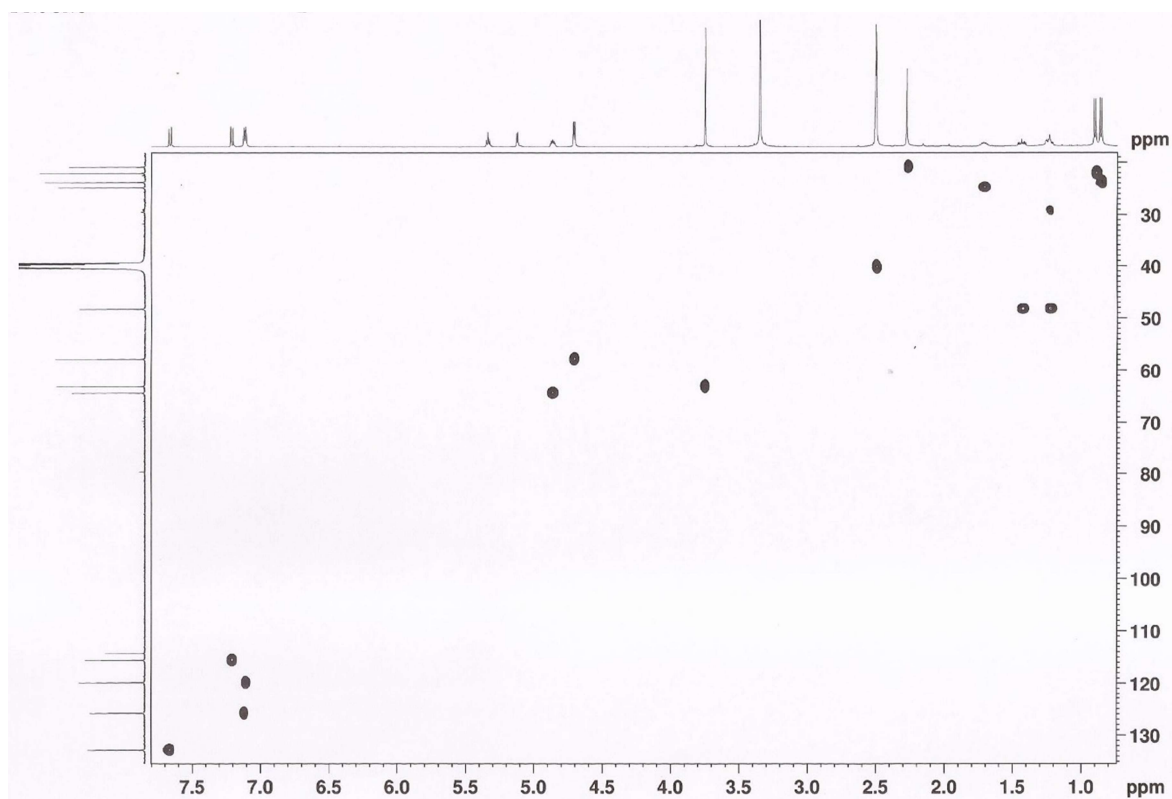

**Figure S36.** HMBC spectrum of **7** (DMSO- $d_6$ , 500 MHz).

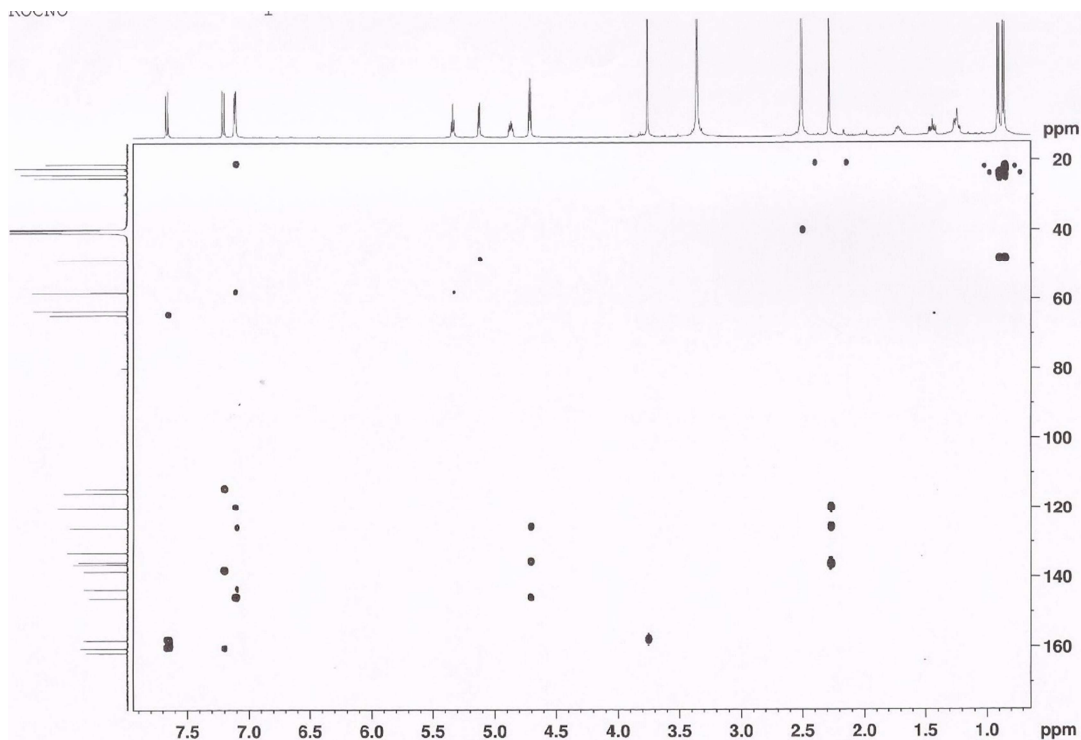

Figure S37. (+)-HRESIMS of 7.

#### Elemental Composition Report [MH]<sup>+</sup>

##### Single Mass Analysis

Tolerance = 5.0 PPM / DBE: min = -1.5, max = 50.0

Element prediction: Off

Number of isotope peaks used for i-FIT = 3

Monoisotopic Mass, Even Electron Ions

24 formula(e) evaluated with 1 results within limits (up to 100 best isotopic matches for each mass)

Elements Used:

C: 21-21 H: 0-150 O: 0-30

Minimum:

-1.5

Maximum:

50.0

| Mass     | Calc. Mass | mDa | PPM | DBE | i-FIT | Norm | Conf(%) | Formula    |
|----------|------------|-----|-----|-----|-------|------|---------|------------|
| 373.1652 | 373.1651   | 0.1 | 0.3 | 9.5 | 685.0 | n/a  | n/a     | C21 H25 O6 |

ANALYSIS: 158-208 Prep 1  
ANALYSIS: 158-208 Prep 1

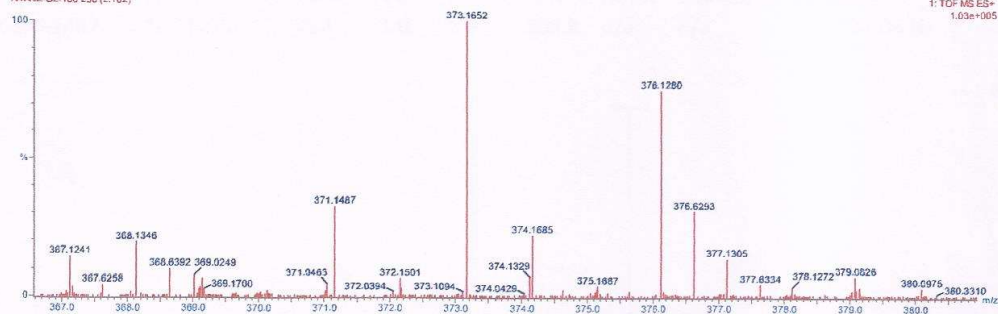

Figure S38. <sup>1</sup>H NMR spectrum of 8 (DMSO-*d*<sub>6</sub>, 300 MHz).

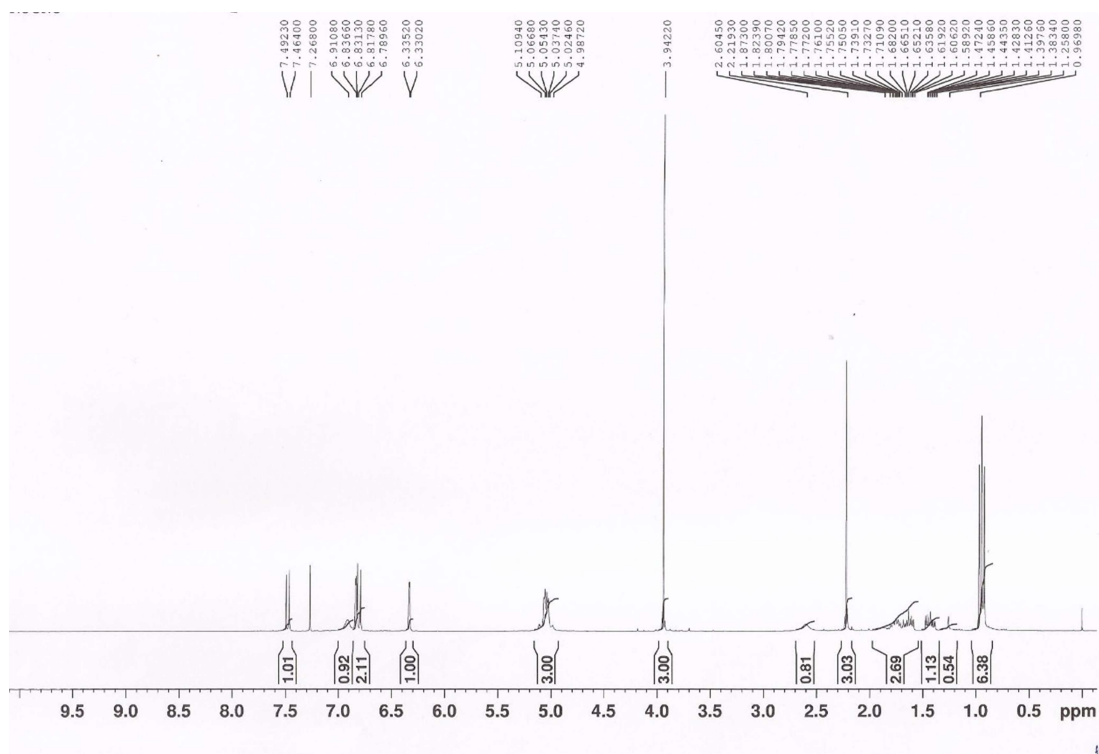

**Figure S39.**  $^{13}\text{C}$  NMR spectrum of **8** (DMSO- $d_6$ , 75 MHz).

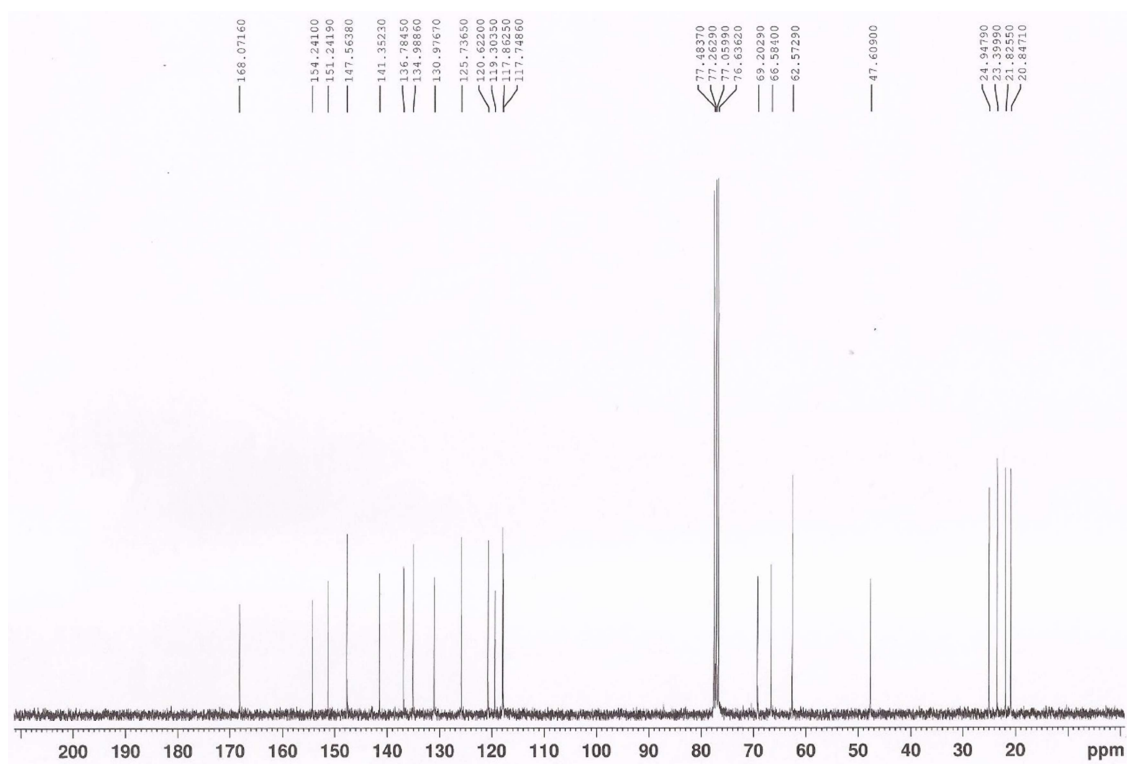

**Figure S40.** COSY spectrum of **8** (DMSO- $d_6$ , 300 MHz).

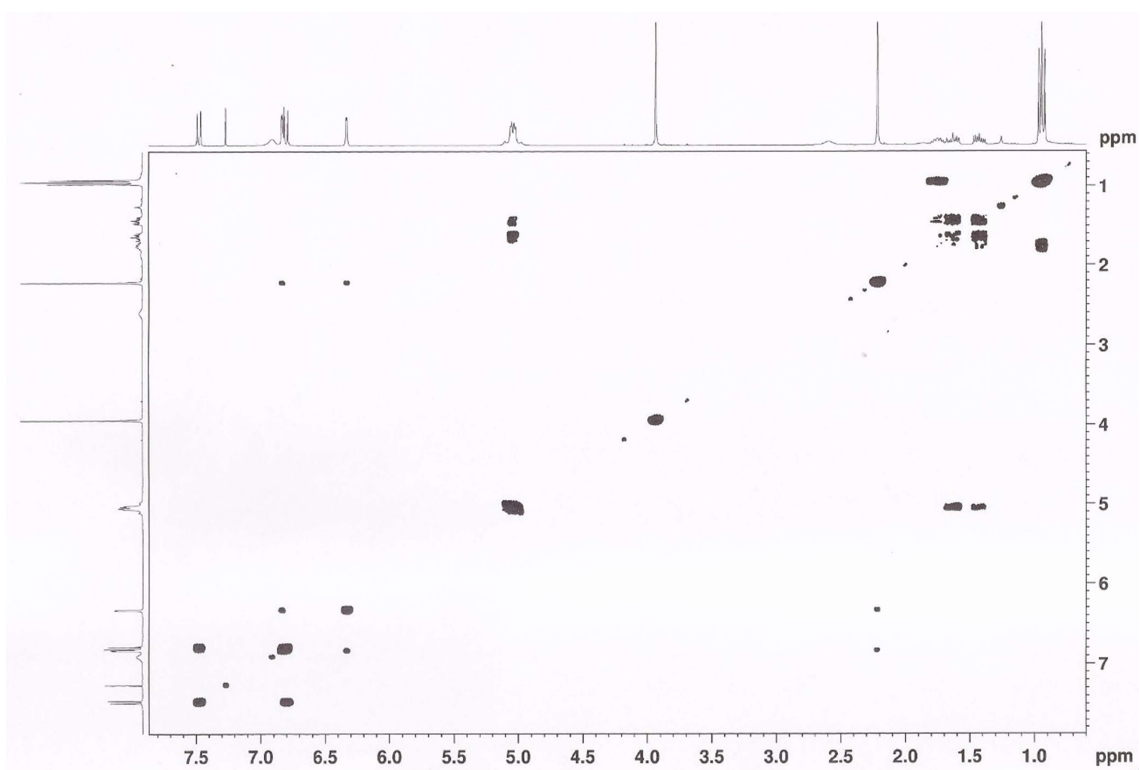

**Figure S41.** HSQC spectrum of **8** (DMSO-*d*<sub>6</sub>, 300 MHz).

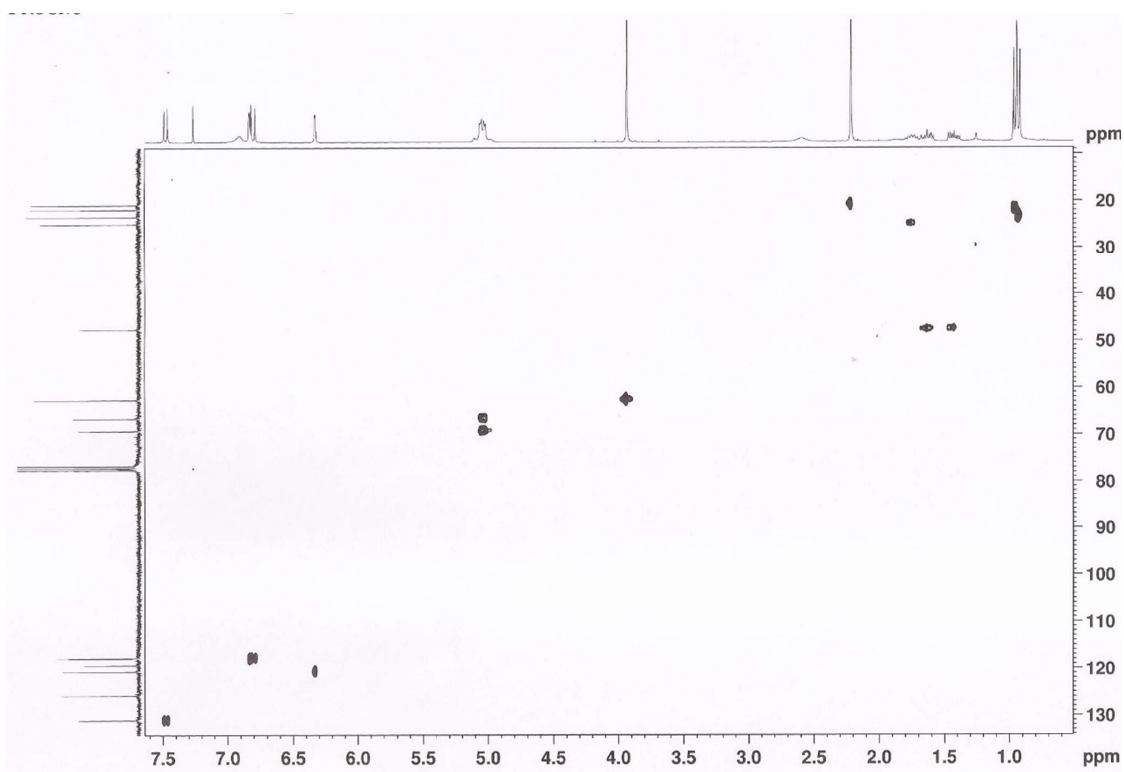

**Figure S42.** HMBC spectrum of **8** (DMSO-*d*<sub>6</sub>, 300 MHz).

**Figure S43.** (+)-HRESIMS of **8**.

### Elemental Composition Report [MH]<sup>+</sup>

Single Mass Analysis

Tolerance = 5.0 PPM / DBE: min = -1.5, max = 50.0

Element prediction: Off

Number of isotope peaks used for i-FIT = 3

Monoisotopic Mass, Even Electron Ions

24 formula(e) evaluated with 1 results within limits (up to 100 best isotopic matches for each mass)

Elements Used:

C: 21-21 H: 0-150 O: 0-30

Minimum:

-1.5

Maximum:

5.0

5.0

50.0

| Mass     | Calc. Mass | mDa | PPM | DBE | i-FIT | Norm | Conf(%) | Formula    |
|----------|------------|-----|-----|-----|-------|------|---------|------------|
| 373.1654 | 373.1651   | 0.3 | 0.8 | 9.5 | 768.4 | n/a  | n/a     | C21 H25 O6 |

### Elemental Composition Report [MNa]<sup>+</sup>

Single Mass Analysis

Tolerance = 5.0 PPM / DBE: min = -1.5, max = 50.0

Element prediction: Off

Number of isotope peaks used for i-FIT = 3

Monoisotopic Mass, Even Electron Ions

49 formula(e) evaluated with 1 results within limits (up to 100 best isotopic matches for each mass)

Elements Used:

C: 21-21 H: 0-150 O: 0-30 Na: 0-1

Minimum:

-1.5

Maximum:

5.0

5.0

50.0

| Mass     | Calc. Mass | mDa | PPM | DBE | i-FIT | Norm | Conf(%) | Formula       |
|----------|------------|-----|-----|-----|-------|------|---------|---------------|
| 395.1473 | 395.1471   | 0.2 | 0.5 | 9.5 | 822.8 | n/a  | n/a     | C21 H24 O6 Na |

ARMS 109-155 Sep 9-12  
ANALKE-G2-167.258 (2.118)

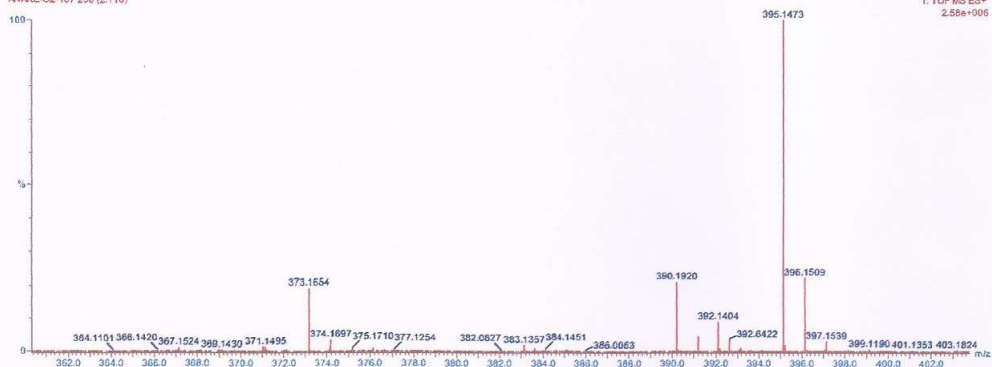

**Table S1.**  $^1\text{H}$  and  $^{13}\text{C}$  NMR (DMSO- $d_6$ , 300 and 75 MHz) and HMBC assignment for **1**.

| Position | $\delta_{\text{C}}$ , type | $\delta_{\text{H}}$ , $J$ in Hz              | COSY                    | HMBC              |
|----------|----------------------------|----------------------------------------------|-------------------------|-------------------|
| 1        | 169.9, C                   | -                                            |                         |                   |
| 3        | 75.8, CH                   | 4.69, m                                      | H <sub>2</sub> -4, Me-9 |                   |
| 4        | 34.2, CH <sub>2</sub>      | 2.80, dd (16.5, 11.1)<br>2.93 dd (16.5, 3.5) | H-5                     | C-3, 4a, 5, 8a, 9 |
| 4a       | 142.7, C                   | -                                            |                         |                   |
| 5        | 107.2, CH                  | 6.24, brs                                    | H <sub>2</sub> -1'      | C-4, 7, 8a        |
| 6        | 164.9, C                   | -                                            |                         |                   |
| 7        | 101.3, CH                  | 6.19, d (1.9)                                |                         | C-5, 6, 8a        |
| 8        | 163.9, C                   | -                                            |                         |                   |
| 8a       | 100.5, C                   |                                              |                         |                   |
| 9        | 20.7, CH <sub>3</sub>      | 1.39, d (6.3)                                | H-3                     | C-3, 4            |
| OH-8     | -                          | 11.13, s                                     |                         | C-7, 8            |

**Table S2.**  $^1\text{H}$  and  $^{13}\text{C}$  NMR (DMSO- $d_6$ , 300 and 75 MHz) and HMBC assignment for **2**.

| Position | $\delta_{\text{C}}$ , type | $\delta_{\text{H}}$ , $J$ in Hz | COSY                                   | HMBC             |
|----------|----------------------------|---------------------------------|----------------------------------------|------------------|
| 1        | 161.9, C                   |                                 |                                        |                  |
| 2        | 125.2 CH                   | 7.13, d (1.6)                   | H-4                                    | C-1, 1', 4, 9a   |
| 3        | 148.8, C                   |                                 |                                        |                  |
| 4        | 120.0, CH                  | 7.46, d (1.6)                   | H-2                                    | C, 1', 2, 9a, 10 |
| 4a       | 132.2, C                   |                                 |                                        |                  |
| 5        | 107.8, CH                  | 7.18, d (2.3)                   | H-7                                    | C-7, 8a, 10      |
| 6        | 165.7, C                   |                                 |                                        |                  |
| 7        | 105.4, CH                  | 6.08, d (2.3)                   | H-5                                    | C-5, 6, 8a       |
| 8        | 164.0, C                   |                                 |                                        |                  |
| 8a       | 112.6, C                   |                                 |                                        |                  |
| 9        | 186.6, CO                  |                                 |                                        |                  |
| 9a       | 115.1, C                   |                                 |                                        |                  |
| 10       | 183.0, CO                  |                                 |                                        |                  |
| 10a      | 137.3, C                   |                                 |                                        |                  |
| OMe-8    | 56.7, CH <sub>3</sub>      | 3.89, s                         |                                        | C-8              |
| 1'       | 45.5, CH <sub>2</sub>      | 2.71, m                         | H-2'                                   | C-2', 3          |
| 2'       | 67.1, CH                   | 3.86, m                         | H <sub>2</sub> -1', H <sub>3</sub> -3' | C-3              |
| 3'       | 23.9, CH <sub>3</sub>      | 1.09, d (6.1)                   | H-2'                                   | C-1', 2'         |
| OH-1     | -                          | 13.30, s                        |                                        | C-1, 2, 9a       |

**Table S3.**  $^1\text{H}$  and  $^{13}\text{C}$  NMR (DMSO- $d_6$ , 500 and 125 MHz) and HMBC assignment for **3**.

| Position | $\delta_{\text{C}}$ , type | $\delta_{\text{H}}$ , $J$ in Hz | COSY | HMBC       |
|----------|----------------------------|---------------------------------|------|------------|
| 1        | 162.1, C                   |                                 |      |            |
| 2        | 122.8 CH                   | 7.25, d (1.8)                   | H-4  | C1', 4, 9a |
| 3        | 144.5, C                   |                                 |      |            |



|         |                       |               |     |                    |
|---------|-----------------------|---------------|-----|--------------------|
| 4       | 117.0, CH             | 7.55, d (1.8) | H-2 | C-2, 1', 9a, 10    |
| 4a      | 133.0, C              |               |     |                    |
| 5       | 108.7, CH             | 7.16, d (2.2) | H-7 | C-7, 8a, 10        |
| 6       | 166.6, C              |               |     |                    |
| 7       | 105.6, CH             | 6.76, d (2.2) | H-5 | C-5, 6, 8a         |
| 8       | 164.2, C              |               |     |                    |
| 8a      | 112.2, C              |               |     |                    |
| 9       | 186.1, CO             |               |     |                    |
| 9a      | 116.5, C              |               |     |                    |
| 10      | 182.9, CO             |               |     |                    |
| 10a     | 137.1, C              |               |     |                    |
| OMe-8   | 56.6, CH <sub>3</sub> | 3.89, s       |     | C-8                |
| 1'      | 64.8, CH <sub>2</sub> | 5.16, s       |     | C-2, 3, 4, CO (Ac) |
| CO (Ac) | 170.7, CO             |               |     |                    |
| Me (Ac) | 21.1, CH <sub>2</sub> | 2.13, s       |     | CO (Ac)            |
| OH-1    | -                     | 13.52, s      |     |                    |

**Table S4.** <sup>1</sup>H and <sup>13</sup>C NMR (300 and 75 MHz, DMSO-d<sub>6</sub>) and HMBC assignment of **5**.

| Position | δ <sub>C</sub> , type  | δ <sub>H</sub> , <i>J</i> in Hz | COSY     | HMBC                    |
|----------|------------------------|---------------------------------|----------|-------------------------|
| 1        | 124.0, C               |                                 |          |                         |
| 2        | 153.9, C               |                                 |          |                         |
| 3        | 129.4, C               |                                 |          |                         |
| 4        | 126.8, CH              | 7.16, d (8.6)                   | H-5      | C-2, 6, 8               |
| 5        | 112.2, CH              | 6.38, d (8.6)                   | H-4      | C-1, 3, 6               |
| 6        | 154.7, C               |                                 |          |                         |
| 7        | 168.2, CO              |                                 |          |                         |
| 8        | 68.4, CH               | 4.02, dd (9.0, 4.5)             | H-9      | C-3, CO (Ac)            |
| 9a       | 45.3, CH <sub>2</sub>  | 1.48, m                         | H-8, 10  | C-8, 10                 |
| b        |                        | 1.70, m                         |          |                         |
| 10       | 24.9, CH               | 1.56, m                         | H-9      |                         |
| 11       | 23.3, CH <sub>3</sub>  | 0.90, d (6.2)                   | H-10     | C-9, 10, 12             |
| 12       | 22.2, CH <sub>3</sub>  | 0.90, d (6.2)                   | H-10     | C-9, 10, 11             |
| 1'       | 130.0, C               |                                 |          |                         |
| 2'       | 144.1, C               |                                 |          |                         |
| 3'       | 151.7, C               |                                 |          |                         |
| 4'       | 125.1, CH              | 7.02, d (1.3)                   | H-6', 8' | C-2', 3', 6', 8'        |
| 5'       | 136.3, C               |                                 |          |                         |
| 6'       | 117.6, CH              | 7.05, d (1.3)                   | H-4', 8' | C-2', 3'(w), 4', 7', 8' |
| 7'       | 190.3, COH             | 10.27, s                        |          | C-1', 6'                |
| 8'       | 21.1, CH <sub>3</sub>  | 2.27, s                         |          | C-4', 5', 6'            |
| OMe-2    | 62.1, OCH <sub>3</sub> | 3.88, s                         |          | C-2                     |
| CO (Ac)  | 170.3, CO              |                                 |          |                         |
| Me (Ac)  | 21.4, CH <sub>3</sub>  | 2.00, s                         |          | CO (Ac)                 |

w= weak

**Table S5.** <sup>1</sup>H and <sup>13</sup>C NMR (300 and 75 MHz, CDCl<sub>3</sub>) and HMBC assignment of **8**.

| Position | $\delta_C$ , type      | $\delta_H$ , $J$ in Hz                                   | COSY     | HMBC             |
|----------|------------------------|----------------------------------------------------------|----------|------------------|
| 1        | 125.7, C               |                                                          |          |                  |
| 2        | 154.2, C               |                                                          |          |                  |
| 3        | 136.8, C               |                                                          |          |                  |
| 4        | 131.0, CH              | 7.48, d (8.5)                                            | H-5      | C-1 (w), 2, 6, 8 |
| 5        | 117.7, CH              | 6.80, d (8.5)                                            | H-4      | C-1, 3, 6, 7 (w) |
| 6        | 151.2, C               |                                                          |          |                  |
| 7        | 168.0, CO              |                                                          |          |                  |
| 8        | 66.6, CH               | 5.04, m                                                  | H-9a, 9b | C-2, 3, 9        |
| 9a<br>b  | 47.6, CH <sub>2</sub>  | 1.43, ddd (13.7, 8.9, 4.2)<br>1.64, ddd (13.7, 8.9, 5.1) | H-8      | C-3, 8, 11       |
| 10       | 24.9, CH               | 1.76, m                                                  | H-12, 13 |                  |
| 11       | 23.4, CH <sub>3</sub>  | 0.93, d (6.7)                                            | H-10     | C-9, 10, 12      |
| 12       | 21.8, CH <sub>3</sub>  | 0.96, d (6.7)                                            | H-10     | C-9, 10, 11      |
| 1'       | 125.7, C               |                                                          |          |                  |
| 2'       | 141.4, C               |                                                          |          |                  |
| 3'       | 147.6, C               |                                                          |          |                  |
| 4'       | 117.9, CH              | 6.83, d (1.5)                                            | H-6'     | C-2', 3', 6', 8' |
| 5'       | 135.0, C               |                                                          |          |                  |
| 6'       | 120.6, CH              | 6.33, d (1.5)                                            | H-4'     | C-2', 4', 7', 8' |
| 7'       | 69.2 CH <sub>2</sub>   | 5.04, m                                                  |          |                  |
| 8'       | 20.8, CH <sub>3</sub>  | 2.22, s                                                  |          | C-4', 5', 6'     |
| OMe-2    | 62.6, OCH <sub>3</sub> | 3.94, s                                                  |          | C-2              |
| OH-3'    |                        | 6.91, br                                                 |          |                  |
